# Supplementary material for: Function-oriented investigations of a peptide-based catalyst that mediates enantioselective allylic alcohol epoxidation.
Source: Royal Society of Chemistry journal article supplement (doi:10.1039/c4sc01440e), 2014-01-01

## Supplementary Information

for

### Function-Oriented Investigations of a Peptide-Based Catalyst that Mediates Enantioselective Allylic Alcohol Epoxidation.

Nadia C. Abascal, Phillip A. Lichtor, Michael W. Giuliano, Scott J. Miller\*

*Department of Chemistry, Yale University, P.O. Box 208107, New Haven, Connecticut 06520-8107, United States.*

|                                                                                                            |    |
|------------------------------------------------------------------------------------------------------------|----|
| <b>1. General Information</b>                                                                              | 2  |
| <b>2. Experimental Procedures</b>                                                                          |    |
| 2.1 General Procedure for Racemic Epoxide                                                                  | 3  |
| 2.2 General Procedure for Peptide-catalyzed Epoxidation                                                    | 3  |
| 2.3 General Procedure for DIBAL-H Reduction of an Ester                                                    | 4  |
| 2.4 General Procedure for Derivatization of Epoxides with Benzoyl Chloride                                 | 4  |
| 2.5 Preparation of Ethyl (Z)-3-phenylacrylate                                                              | 4  |
| 2.6 Preparation of (E)- and (Z)-Ethyl 3-Phenylpent-2-enoate                                                | 5  |
| 2.7 Preparation of 2-Phenylprop-2-en-1-ol                                                                  | 5  |
| 2.8 Preparation of (Z)-Non-2-en-1-ol                                                                       | 6  |
| 2.9 Preparation of 1,1-Diphenylprop-2-en-1-ol                                                              | 6  |
| 2.10 Sharpless Asymmetric Epoxidation to Determine Absolute Stereochemistry of <b>16</b>                   | 7  |
| <b>3. Analytical data</b>                                                                                  | 7  |
| <b>4. General Protocols for Peptide Synthesis</b>                                                          |    |
| 4.1 Solution Peptide Synthesis                                                                             | 13 |
| 4.2 Solid Phase Peptide Synthesis                                                                          | 13 |
| 4.3 Standard Fm-ester Deprotection                                                                         | 13 |
| <b>5. Synthesis and Characterization of Truncated Peptides</b>                                             | 13 |
| <b>6. Kinetics</b>                                                                                         |    |
| 6.1 Procedure for Determining Response Factor ( $f_r$ ) of Dodecane Internal Standard                      | 17 |
| 6.2 Procedure for Gathering Kinetic Data                                                                   | 17 |
| <b>7. NMR Experiments</b>                                                                                  | 20 |
| <b>8. NMR Structure Elucidation</b>                                                                        |    |
| 8.1 Modeling peptide <b>6</b>                                                                              | 21 |
| 8.2 Calculated NMR structures of <b>6</b> and their respective binning procedures                          | 23 |
| <b>9. Tabulated RMSD (Å) values for pairwise fitting of different backbone regions of peptide <b>6</b></b> | 26 |
| <b>10. Crystallographic data</b>                                                                           | 30 |
| <b>11. Spectral Data</b>                                                                                   | 41 |

## 1. General Information

Nuclear magnetic resonance was carried out on either 400, 500, or 600 MHz Bruker and Varian spectrometers at ambient temperatures. All samples were prepared in  $\text{CDCl}_3$  and referenced to tetramethyl silane (TMS) or residual solvent.<sup>1</sup> NMR data is reported as chemical shift with multiplicity, coupling constant, and integration accompanying. Multiplicity is reported in the following manner: singlet (s), doublet (d), doublet of doublets (dd), doublet of doublet of doublets (ddd), triplet (t), quartet (q), pentet (p), multiplet (m).

Gas chromatography (GC) was performed on an instrument equipped with HP-5 columns (30 m, 0.320 mm diameter, 0.25  $\mu\text{m}$  film thickness). The instrument employed flame ionization detectors using He as a carrier gas.

Analytical thin layer chromatography (TLC) was performed on silica gel 60  $\text{\AA}$   $\text{F}_{254}$  pre-coated plates (0.25 thickness). The developed plates were visualized by a UV lamp and/or cerium ammonium molybdate (CAM) or  $\text{KMnO}_4$  stains. Preparative thin layer chromatography (prep-TLC) was generally performed using 1000  $\mu\text{m}$  thick plates coated with silica gel GF (Uniplate) with UV 254 indicator.

Flash column chromatography was performed with silica gel 60  $\text{\AA}$  (32-63 microns).

Optical rotations were collected on a polarimeter using the sodium D line (1.0 dm path length) at 20 °C. Solutions for optical rotation were prepared in  $\text{CHCl}_3$  at a concentration of 1 g/100 mL.

High-resolution liquid chromatography-mass spectrometry (HRLC/MS) was carried out on an instrument equipped with an ESI, a QToF mass spectrometer, and a photodiode array detector.

High resolution mass spectrometry (HRMS) data were acquired by the FT-ICR Mass Spectrometry Resource of the Keck Biotechnology Resource Laboratory. The mass spectral data were obtained from a Bruker (Billerica, MA) 9.4 Tesla Apex-Qe Hybrid Qe-Fourier Transform Ion Cyclotron Resonance (FT-ICR) mass spectrometer consisting of an Apollo II electrospray ionization source. The sample was directly infused into the FT-ICR MS via a TriVersa NanoMate (Advion BioScience) utilizing a D-chip configuration which consisted of a 384-nozzle nanoESI chip (for flow rate between 2-15 nL/min) with each nozzle having a 4.5  $\mu\text{m}$  id at the electrospray tip. The entrance to the Apollo II source is grounded and ~1400V potential was applied on the nanoESI chip, with back pressure on the syringe at 0.6 psi. The mass spectrometer (running Compass Software with APEX control acquisition component (v.1.2) is setup to acquire single fid (512K) data and with a mass range (m/z) from 100 to 2000. Exact mass were obtained for the entire broadband spectrum. Subsequently, various instrument parameters were adjusted to maximize the signal(s) around the peak of interest. Bruker Daltonics

---

<sup>1</sup> Gottlieb, H. E., Kotlyar, V. Nudelman, A. J. Org. Chem. 1997, 62, 7512-7515.

DataAnalysis software (v. 3.4) was utilized for the analysis of the data and assignments were made based on exact mass measurements and fit of isotopic peaks to that of theoretical isotopic patterns (IsotopePattern algorithm, Bruker). Collected time transient data were zero filled, Fourier transformed, magnitude calculations to generated m/z mass spectrum.

Enantiomeric excess (ee) values were acquired using a chiral analytical HPLC with chiral columns at 20 °C. The HPLC was equipped with a diode array detector collecting at 210, 230, and 254 nm.

Some reactions were carried out with solvents purified from a Seca Solvent Purification System by GlassContour. However, all other chemicals were purchased and used as received unless otherwise noted.

Dr. Danielle Gray University of Illinois School of Chemical Sciences determined the reported crystal structure. See SI-29 and attached file for relevant details.

## **2. Experimental Procedures**

**2.1 General Procedure for Racemic Epoxide.** An allylic alcohol (1.0 equiv) was loaded into a round bottom flask. The material was dissolved in dichloromethane (0.2 M in substrate) and de-ionized water (2.0 M in substrate). *meta*-Chloroperoxybenzoic acid (77% w/w, 1.0 equiv) and dibasic sodium phosphate (2 equiv) were added in a single portion. The solution was allowed to stir at room temperature until TLC no longer showed the presence of starting material. Following this, the reaction mixture was diluted with dichloromethane and poured into a separatory funnel containing sat. aq. Na<sub>2</sub>SO<sub>3</sub>. The organic layer was separated and washed with sat. aq. NaHCO<sub>3</sub>. The combined organic layers were dried over Na<sub>2</sub>SO<sub>4</sub> and concentrated. The crude residue was purified by flash column chromatography using the appropriate solvent system (noted in the characterization of each compound). Where necessary, an aliquot of the mixture was taken forward to be derivatized with a chromophore for HPLC analysis.

**2.2 General Procedure for Peptide-Catalyzed Epoxidation.** Peptide (0.1 equiv) was loaded into a flask, followed by an allylic alcohol (1.0 equiv). A solution of HOBt•H<sub>2</sub>O (0.1 equiv), DMAP (0.1 equiv), and, for the so-called conditions b, triethyl amine (0.1 equiv) in chloroform (filtered through basic alumina, 0.2 M in substrate) was added to the mixture. Aqueous hydrogen peroxide (30% w/w, 2.0 equiv) was pipetted into the reaction vessel and it was placed in an ice bath. Diisopropylcarbodiimide (1.0 equiv) was delivered and the reaction mixture was transported to a cold room to stir for 7 hours at 4 °C. The solution was washed with sat. aq. Na<sub>2</sub>SO<sub>3</sub> and sat. aq. NaHCO<sub>3</sub>. This biphasic mixture was extracted with EtOAc and vortexed. The newly buoyant organic layer was concentrated under a stream of nitrogen and extracted again with EtOAc (x 3). The combined organic layers were concentrated under a stream of N<sub>2</sub> and either taken forward to be derivatized with a chromophore for HPLC analysis or chromatographed by the specifications noted in the characterization of each compound.

### 2.3 General Procedure for DIBAL-H Reduction of Esters (Procedure A).<sup>2</sup>

Dichloromethane (0.3 M in substrate) was loaded into a flamed-dried flask and placed under N<sub>2</sub>. The ester (1.0 equiv) was added to the solvent and the solution was brought to -78 °C. A 1.0 M solution of DiBAL-H in hexanes (2.2 equiv) was added dropwise. The reaction mixture was allowed to stir for 100 min. Following this, the mixture was brought to 0 °C and an aqueous solution of Rochelle salt was added dropwise until a gel-like substance formed and took up the volume of the flask. Diethyl ether was added, followed by MgSO<sub>4</sub>, which was added until the particulates were free flowing. The contents of the flask were filtered through a fritted funnel packed first with Celite and topped with MgSO<sub>4</sub>. The pad of Celite and MgSO<sub>4</sub> was washed with Et<sub>2</sub>O. The filtrate was concentrated *in vacuo*. The crude residue was chromatographed according to the details specified in the characterization of each compound.

### 2.4 General Procedure for Derivatization of Epoxide with Benzoyl Chloride (Procedure B).

An aliquot of the crude epoxide (1.0 equiv, assumed to be only epoxide) was delivered to a 2 mL vial and concentrated under a stream of N<sub>2</sub>. DMAP (2.5 equiv) was added, and the vial's contents were dissolved in dichloromethane (0.2 M in substrate). Benzoyl chloride was added, and the mixture was allowed to sit for 40-45 minutes. The solution was quenched with sat. aq. NaHCO<sub>3</sub> and extracted with hexanes. The top layer of the biphasic mixture (the organic layer) was concentrated under and stream of nitrogen. The mixture was then extracted with EtOAc (x 3) and the combined organic layers were concentrated under a stream of N<sub>2</sub>. The crude residue was purified by prep-TLC with a 100% dichloromethane eluent.

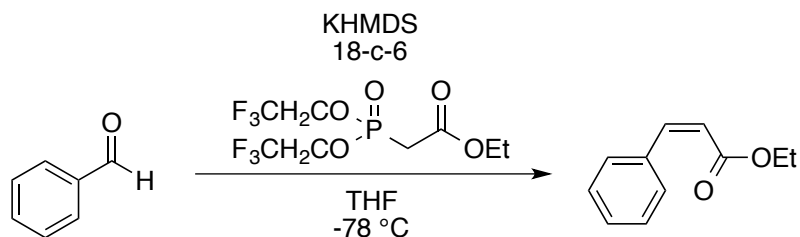

**2.5 Preparation of Ethyl (Z)-3-phenylacrylate (SI 1):<sup>3</sup>** A flame-dried, round bottom flask was charged with ethyl 2-bis(2,2,2-trifluoroethoxy)phosphorylacetate (0.782 g, 2.36 mmol), 18-crown-6 (3.11 g, 11.8 mmol), and anhydrous THF (47.1 mL, 0.05 M in aldehyde). The mixture was then brought to -78 °C and the flask was flushed with N<sub>2</sub>. Potassium bis(trimethylsilyl)amide (20% in toluene, 2.72 mL, 2.36 mmol) was added and the mixture was allowed to stir for 30 min. The aldehyde (0.239 mL, 2.36 mmol) was added slowly, and the mixture was stirred until TLC indicated that all of the starting material had been consumed. The reaction mixture was then allowed to come to room temperature, and sat. aq. NH<sub>4</sub>Cl was added to the flask. The mixture was diluted with Et<sub>2</sub>O and transferred to a separatory funnel. The aqueous layer was extracted twice with

<sup>2</sup> Peris, G.; Jakobsche, C.E.; Miller, S.J. *J. Am. Chem. Soc.* **2007**, *129*, 8710-8711.

<sup>3</sup> Still, W.C.; Gennari, C. *Tet. Lett.* **1983**, *24*, 4405-4408.

Et<sub>2</sub>O. The combined organic layers were dried over NaSO<sub>4</sub>, filtered, and concentrated *in vacuo*. The crude residue was chromatographed on silica (200 mL SiO<sub>2</sub>, gradient 10% to 20% EtOAc in hexanes) to yield 0.1815 g (45% yield) of a clear and colorless oil. **<sup>1</sup>H NMR (400 MHz, CDCl<sub>3</sub>)** δ 7.63–7.51 (m, 2H), 7.39–7.27 (m, 3H), 6.93 (d, *J* = 12.6 Hz, 1H), 5.94 (d, *J* = 12.6 Hz, 1H), 4.16 (q, *J* = 7.1 Hz, 2H), 1.23 (t, *J* = 7.2 Hz, 3H). **MS:** Exact mass calculated for mass [C<sub>11</sub>H<sub>12</sub>O<sub>2</sub> + H]<sup>+</sup> requires *m/z* = 177.09; found 177.09.

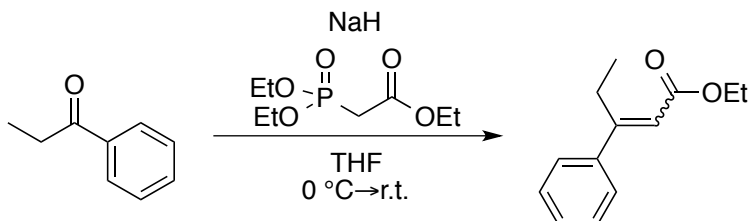

**2.6 Preparation of (*E*)- and (*Z*)-Ethyl 3-Phenylpent-2-enoate (SI 2):** Dry NaH (0.130 g, 5.40 mmol) was added to a flame-dried 100 mL round-bottom flask equipped with a stir bar. The material was dissolved in anhydrous THF (18.0 mL) and the vessel was placed in an ice bath. Triethyl phosphonoacetate (1.29 mL, 6.48 mmol) was added slowly *via* syringe and the mixture was allowed to stir at 0 °C for 20 minutes. Following this period, a solution of propiophenone (0.479 mL, 3.60 mmol) in anhydrous THF (5.4 mL) was added to the mixture while it still stirred in the ice bath. The reaction mixture was then allowed to stir at room temperature overnight. The reaction was quenched with sat. aq. NH<sub>4</sub>Cl (20 mL). The biphasic mixture was transferred to a separatory funnel containing sat. aq. NH<sub>4</sub>Cl (10 mL). The aqueous layer was extracted with Et<sub>2</sub>O (10 mL, 3x) and dried over MgSO<sub>4</sub>. The material was filtered and concentrated *in vacuo*. The crude residue was chromatographed (50 mL SiO<sub>2</sub>, 5% to 10% to 15% EtOAc in hexanes gradient) and the (*E*) and (*Z*) isomers were isolated in 0.362 g (49% yield) and 0.198 g (40% yield), respectively. Each isomer was then reduced by DiBAL-H according to the procedure above. (*E*)-ethyl 3-phenylpent-2-enoate: **<sup>1</sup>H NMR (400 MHz, CDCl<sub>3</sub>)** δ 7.48–7.26 (m, 5H), 6.01 (s, 1H), 4.20 (q, *J* = 7.1 Hz, 2H), 3.11 (q, *J* = 7.5 Hz, 2H), 1.36–1.14 (m, 3H), 1.08 (t, *J* = 7.5 Hz, 3H). (*Z*)-ethyl 3-phenylpent-2-enoate: **<sup>1</sup>H NMR (400 MHz, CDCl<sub>3</sub>)** δ 7.32–7.10 (m, 3H), 7.12–6.99 (m, 2H), 5.78 (t, *J* = 1.4 Hz, 1H), 3.89 (q, *J* = 7.1 Hz, 2H), 2.36 (qd, *J* = 7.3, 1.5 Hz, 2H), 0.96 (td, *J* = 7.2, 2.4 Hz, 6H). **MS:** Exact mass calculated for mass [C<sub>13</sub>H<sub>16</sub>O<sub>2</sub> + H]<sup>+</sup> requires *m/z* = 205.12; found 205.12.

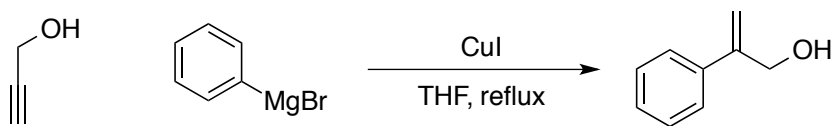

**2.7 Preparation of 2-Phenylprop-2-en-1-ol (SI 3):** A flame-dried three neck 100 mL round bottom flask was equipped with a cold water condenser and charged with CuI (0.143 g, 0.750 mmol) and a solution of phenyl Grignard (0.5 M in THF, 30 mL). Propargyl alcohol (0.289 mL, 5.00 mmol) in anhydrous THF (5.0 mL) was added slowly to the flask. The solution was allowed to reflux overnight. After cooling, the reaction mixture was quenched with sat. aq. NH<sub>4</sub>Cl (30 mL) and transferred to a separatory funnel containing sat. aq. NH<sub>4</sub>Cl (10 mL). The aqueous layer was extracted with Et<sub>2</sub>O

(10 mL, 3x) and dried over  $\text{MgSO}_4$ . The material was filtered and concentrated *in vacuo*. The crude residue was chromatographed (50 mL  $\text{SiO}_2$ , 30%  $\text{Et}_2\text{O}$  in pentane) to afford 0.242 g (36% yield) of a clear oil.  $^1\text{H NMR}$  (400 MHz,  $\text{CDCl}_3$ )  $\delta$  7.49–7.27 (m, 5H), 5.48 (q,  $J$  = 1.0 Hz, 1H), 5.36 (q,  $J$  = 1.4 Hz, 1H), 4.59–4.50 (m, 2H), 1.68 (s, 1H). **MS**: Exact mass calculated for mass  $[\text{C}_9\text{H}_{10}\text{O} + \text{H}]^+$  requires  $m/z$  = 135.07; found 135.07.

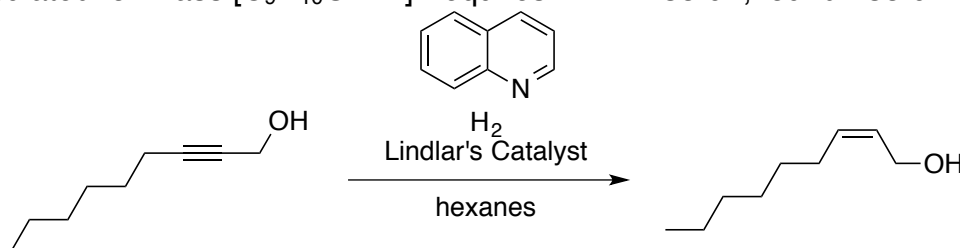

**2.8 Preparation of (Z)-Non-2-en-1-ol (SI 4):** Non-2-yn-1-ol (0.161 mL, 1.00 mmol), quinoline (0.177 mL, 1.50 mmol), Lindlar's Catalyst (0.0168 g), and hexanes (15.7 mL) were loaded into a flame-dried 25 mL round bottom flask. A balloon filled with hydrogen gas was placed on the flask and the flask was sparged with  $\text{H}_2$ . The mixture was allowed to stir for 1 hour before it was filtered through celite and concentrated *in vacuo*. The desired (Z)-non-2-en-1-ol was isolated and chromatographed (50 mL  $\text{SiO}_2$ , 40%  $\text{EtOAc}$  in hexanes) to afford 0.128 g (90% yield) of a clear oil.  $^1\text{H NMR}$  (500 MHz,  $\text{CDCl}_3$ )  $\delta$  5.69–5.52 (m, 2H), 4.22 (d,  $J$  = 6.3 Hz, 2H), 2.14–2.02 (m, 2H), 1.45–1.20 (m, 9H), 0.97–0.87 (m, 3H). **MS**: Exact mass calculated for mass  $[\text{C}_9\text{H}_{18}\text{O} + \text{H}]^+$  requires  $m/z$  = 143.14; found 143.02.

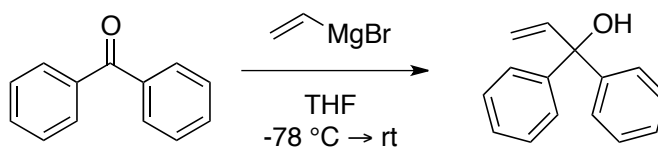

**2.9 Preparation of 1,1-Diphenylprop-2-en-1-ol (SI 5):** Benzophenone (0.9111 g, 5.00 mmol) was loaded into an oven-dried 100 mL round-bottom flask and dissolved in anhydrous THF (5 mL). The solution was then allowed to come to  $-78^\circ\text{C}$ . A solution of 0.6 M vinyl Grignard in THF (26 mL, 15.00 mmol) was cannulated into the benzophenone solution. The reaction mixture was then allowed to stir at  $-78^\circ\text{C}$  for two hours. Following these 2 hours, the mixture was allowed to stir for 2 hours at room temperature. The reaction was quenched with ice, poured into a separatory funnel containing sat. aq.  $\text{NH}_4\text{Cl}$ , and extracted with  $\text{Et}_2\text{O}$ . The combined organic layers were dried over  $\text{Na}_2\text{SO}_4$ , filtered, and concentrated *in vacuo*. The crude residue was chromatographed (50 mL  $\text{SiO}_2$ , eluting with 10%  $\text{EtOAc}$  in hexanes) to afford a clear and colorless liquid (0.3877 g, 37% yield).  $^1\text{H NMR}$  (400 MHz,  $\text{CDCl}_3$ )  $\delta$  7.44–7.29 (10H, m), 6.56 (1H, dd,  $J$  = 10.4, 17.5 Hz), 5.39 (1H, d,  $J$  = 1.3 Hz), 5.35 (1H, s), 2.35 (1H, s). **MS**: Exact mass calculated for mass  $[\text{C}_{15}\text{H}_{14}\text{O} - \text{OH}]^+$  requires  $m/z$  = 193.10; found 193.13.

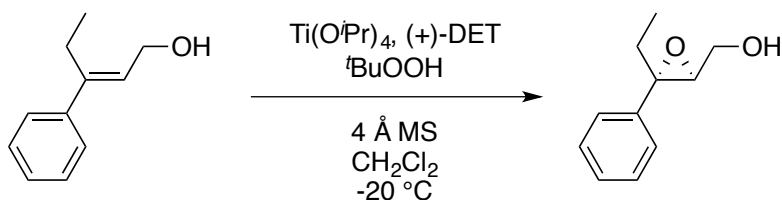

## 2.10 Sharpless Asymmetric Epoxidation to Determine Absolute Stereochemistry

**of 16:**<sup>4</sup> An oven-dried round bottom flask was equipped with a teflon-coated stir bar, charged with 4 Å molecular sieves (0.025 g), and sparged with N<sub>2</sub>. anhydrous DCM (1.59 mL, 0.3 M) was loaded into the flask and mixture was brought to -20 °C. L-(+)-Diethyl tartrate (0.1106 mL, 0.53 mmol) and Ti(O<sup>*i*</sup>Pr)<sub>4</sub> (0.142 mL, 0.48 mmol) were delivered to the stirring heterogeneous mixture followed by *tert*-butyl hydrogen peroxide (0.1739 mL, 0.96 mmol, 5.5 M in decane). This mixture was allowed to age for 3 h at -20 °C. (*E*)-3-Phenylpent-2-en-1-ol (0.078 g and 0.48 mmol) was added as a solution (2 M) in anhydrous DCM (0.24 mL) and the resulting mixture was allowed to stir -20 °C for 30 min. Following this period, the reaction mixture was brought to 0 °C and 1.00 mL of water were added to the flask. The biphasic mixture was allowed to stir for 30 min as it warmed to room temperature. Then, 2.00 mL of a 30% aqueous solution of NaOH saturated with NaCl was added and the mixture stirred for 10 min. Finally, DCM was added to the mixture and the organic layer was separated. The separated organic layer was then concentrated *in vacuo*. The crude residue was chromatographed with an eluent of 40% Et<sub>2</sub>O in pentane to yield a clear and colorless oil. Spectral data, as well as the HPLC order of elution of major and minor enantiomers (See Table SI1), matched that of the (3-ethyl-3-phenyloxiran-2-yl)methanol produced by our method. This confirmed the stereochemical assignment of the epoxide of (*Z*)-3-phenylpent-2-en-1-ol formed *via* our method.

## 3. Analytical Data

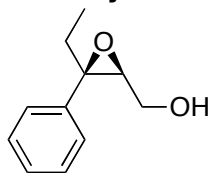

**((2*S*,3*R*)-3-Ethyl-3-phenyloxiran-2-yl)methanol (13):** *R*<sub>f</sub> = 0.4 (40% EtOAc in hexanes, UV, CAM stain). Material was chromatographed with 40% Et<sub>2</sub>O in pentane. <sup>1</sup>H NMR (400 MHz, CDCl<sub>3</sub>) δ 7.45–7.18 (m, 5H), 3.51–3.38 (m, 1H), 3.31 (dd, *J* = 6.7, 4.2 Hz, 1H), 3.27–3.13 (m, 1H), 2.25–2.06 (m, 1H), 1.78–1.67 (m, 2H), 0.89 (t, *J* = 7.5 Hz, 3H). [ $\alpha$ ]<sub>D</sub><sup>20</sup> = -58.4°. **MS:** Exact mass calculated for mass [C<sub>11</sub>H<sub>14</sub>O<sub>2</sub> + H]<sup>+</sup> requires *m/z* = 179.11; found 179.11. Absolute stereochemistry determined by X-ray crystallography of bromobenzoylated compound. See attached files on SI-29.

<sup>4</sup> Gao, Y.; Hanson, R. M.; Klunder, J. M.; Ko, S. Y.; Masamune, H.; Sharpless, K. B. *J. Am. Chem. Soc.* **1987**, *109*, 5765-5780.

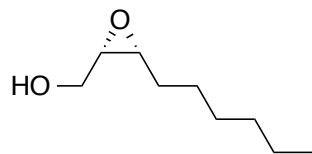

**((2S,3R)-3-Hexyloxiran-2-yl)methanol (14):**  $R_f = 0.5$  (50% EtOAc in hexanes, CAM stain). Material was chromatographed with 50% Et<sub>2</sub>O in pentane. <sup>1</sup>H NMR (400 MHz, CDCl<sub>3</sub>)  $\delta$  3.85 (m, 1H), 3.66 (m, 1H), 3.15 (dt,  $J = 7.0, 4.2$  Hz, 1H), 3.02 (ddd,  $J = 6.7, 5.5, 4.3$  Hz, 1H), 1.92 (dd,  $J = 7.1, 4.3$  Hz, 1H), 1.65–1.19 (m, 10H), 0.95–0.81 (m, 3H).  $[\alpha]_D^{20} = -6.7^\circ$ .<sup>5</sup> **MS:** Exact mass calculated for mass [C<sub>9</sub>H<sub>18</sub>O<sub>2</sub> + H]<sup>+</sup> requires  $m/z = 159.14$ ; found 159.13.

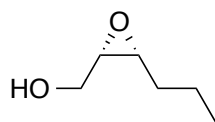

**((2S,3R)-3-Propyloxiran-2-yl)methanol (15):**  $R_f = 0.3$  (40% EtOAc in hexanes, UV, CAM stain). Material was chromatographed with a gradient of 50% to 60% Et<sub>2</sub>O in pentane. <sup>1</sup>H NMR (400 MHz, CDCl<sub>3</sub>)  $\delta$  3.86 (dd,  $J = 12.1, 4.1$  Hz, 1H), 3.68 (dd,  $J = 12.1, 6.9$  Hz, 1H), 3.16 (dt,  $J = 6.9, 4.2$  Hz, 1H), 3.04 (dtd,  $J = 6.5, 4.4, 2.0$  Hz, 1H), 1.71–1.39 (m, 5H), 1.02–0.92 (m, 3H).  $[\alpha]_D^{20} = -3.6^\circ$ .<sup>6</sup> **MS:** Exact mass calculated for mass [C<sub>6</sub>H<sub>12</sub>O<sub>2</sub> + H]<sup>+</sup> requires  $m/z = 117.09$ ; found 117.10.

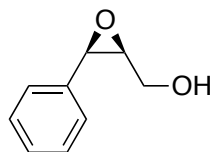

**((2S,3R)-3-Phenyloxiran-2-yl)methanol (16):**  $R_f = 0.6$  (70% EtOAc in hexanes, UV, CAM stain). Material was chromatographed with 60% Et<sub>2</sub>O in pentane. <sup>1</sup>H NMR (400 MHz, CDCl<sub>3</sub>)  $\delta$  7.58–6.90 (m, 5H), 6.54 (dt,  $J = 11.8, 1.8$  Hz, 1H), 5.85 (dt,  $J = 11.7, 6.4$  Hz, 1H), 4.41 (dd,  $J = 6.4, 1.7$  Hz, 2H), 2.10 (s, 1H).  $[\alpha]_D^{20} = -33.5^\circ$ .<sup>7</sup> **MS:** Exact mass calculated for mass [C<sub>9</sub>H<sub>10</sub>O<sub>2</sub> + H]<sup>+</sup> requires  $m/z = 151.08$ ; found 151.08.

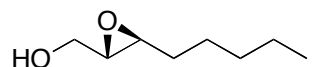

**((2S, 3S)-3-Pentyloxiran-2-yl)methanol (17):**  $R_f = 0.4$  (20% EtOAc in hexanes, CAM stain). Material was chromatographed with 20% Et<sub>2</sub>O in pentane. <sup>1</sup>H NMR (400 MHz, CDCl<sub>3</sub>)  $\delta$  3.91 (ddd,  $J = 12.6, 5.1, 2.6$  Hz, 1H), 3.62 (ddd,  $J = 12.6, 6.8, 4.2$  Hz, 1H), 2.99–2.88 (m, 1H), 1.80 (t,  $J = 6.4$  Hz, 1H), 1.67 (s, 1H), 1.63–1.52 (m, 2H), 1.51–1.38 (m, 2H), 1.37–1.26 (m, 4H), 0.89 (ddt,  $J = 7.3, 4.9, 1.8$  Hz, 3H).  $[\alpha]_D^{20} = -19.9^\circ$ .<sup>4</sup> **MS:** Exact mass calculated for mass [C<sub>8</sub>H<sub>16</sub>O<sub>2</sub> + H]<sup>+</sup> requires  $m/z = 145.12$ ; found 145.13.

<sup>5</sup> Sarabia, F.; Vivar-Garcia, C.; Carcia-Castro, M.; Martin-Ortiz, J. *J. Org. Chem.* **2011**, 76, 3129–3150.

<sup>6</sup> Katsuki, T.; Oguma, T.; Egami, H. *J. Am. Chem. Soc.* **2010**, 132, 5886–5895.

<sup>7</sup> Wang, B.; Wu, X.-Y.; Wong, O.A.; Nettles, B.; Zhao, M.-X.; Chen, D.; Shi, Y. *J. Org. Chem.* **2009**, 74, 3986–3989.



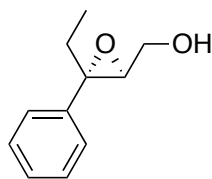

**((2S,3S)-3-Ethyl-3-phenyloxiran-2-yl)methanol (18):**  $R_f = 0.4$  (40% EtOAc in hexanes, UV, CAM stain). Material was chromatographed with 40% Et<sub>2</sub>O in pentane. **<sup>1</sup>H NMR** (400 MHz, CDCl<sub>3</sub>)  $\delta$  7.43–7.18 (m, 5H), 3.99 (m, 1H), 3.85 (m, 1H), 3.12 (dd,  $J = 6.6, 4.3$  Hz, 1H), 2.13 (dq,  $J = 14.2, 7.6$  Hz, 1H), 1.98 (m, 1H), 1.79 (dq,  $J = 14.6, 7.4$  Hz, 1H), 0.94 (t,  $J = 7.5$  Hz, 3H).  $[\alpha]_D^{20} = -2.5^\circ$ .<sup>8</sup> **MS:** Exact mass calculated for mass [C<sub>11</sub>H<sub>14</sub>O<sub>2</sub> + H]<sup>+</sup> requires  $m/z = 179.11$ ; found 179.11. Absolute stereochemistry determined by analogy to product epoxidized using Sharpless Asymmetric Epoxidation conditions. See SI-7 for details.

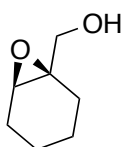

**((1R,6R)-7-Oxabicyclo[4.1.0]heptan-1-yl)methanol (19):**  $R_f = 0.3$  (60% EtOAc in hexanes, UV, CAM stain). Material was chromatographed with 60% Et<sub>2</sub>O in pentane. **<sup>1</sup>H NMR** (400 MHz, CDCl<sub>3</sub>)  $\delta$  3.61 (dd,  $J = 12.2, 4.0$  Hz, 1H), 3.52 (dd,  $J = 12.1, 8.8$  Hz, 1H), 3.20 (dt,  $J = 3.7, 1.1$  Hz, 1H), 2.01–1.84 (m, 1H), 1.84–1.69 (m, 3H), 1.69–1.55 (m, 1H), 1.49–1.30 (m, 2H), 1.22 (dddd,  $J = 14.1, 9.0, 4.1, 2.6$  Hz, 2H).  $[\alpha]_D^{20} = 3.5^\circ$ .<sup>9</sup> **MS:** Exact mass calculated for mass [C<sub>7</sub>H<sub>12</sub>O<sub>2</sub> + H]<sup>+</sup> requires  $m/z = 129.09$ ; found 129.10.

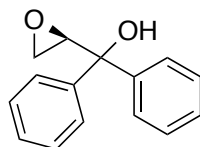

**(R)-Oxiran-2-ylidiphenylmethanol (20):**  $R_f = 0.6$  (20% EtOAc in hexanes, UV, CAM stain). Material was chromatographed with via preparatory TLC with an eluent of 20% EtOAc in hexanes. **<sup>1</sup>H NMR** (400 MHz, CDCl<sub>3</sub>)  $\delta$  7.55–7.46 (m, 2H), 7.42–7.27 (m, 8H), 3.81 (dd,  $J = 4.0, 2.7$  Hz, 1H), 3.00 (dd,  $J = 5.1, 2.7$  Hz, 1H), 2.80 (dd,  $J = 5.1, 4.0$  Hz, 1H), 2.54 (s, 1H). **MS:** Exact mass calculated for mass [C<sub>15</sub>H<sub>14</sub>O<sub>2</sub> + H]<sup>+</sup> requires  $m/z = 227.11$ ; found 227.11. The absolute stereochemistry was determined by comparison to reported HPLC elution times of enantiomers.<sup>10</sup>

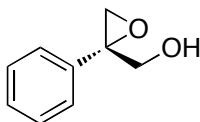

**(S)-(2-Phenyloxiran-2-yl)methanol (21):**  $R_f = 0.4$  (20% EtOAc in hexanes, UV, CAM stain). Material was chromatographed with 40% Et<sub>2</sub>O in pentane. **<sup>1</sup>H**

<sup>8</sup> Wang, B.; Wong, O.A.; Zhao, M.-X.; Shi, Y. *J. Org. Chem.* **2008**, *73*, 9539-9543.

<sup>9</sup> Lifchits, O.; Mahlau, M.; Reisinger, C.M.; Lee, A.; Fares, C.; Polyak, I.; Gopakumar, G.; Theil, W.; List, B. *J. Am. Chem. Soc.* **2013**, *135*, 6677-6693.

<sup>10</sup> Olivares-Romero, J.L.; Li, Z.; Yamamoto, H. *J. Am. Chem. Soc.* **2013**, *135*, 3411-3413.

**NMR** (400 MHz, CDCl<sub>3</sub>)  $\delta$  7.48–7.43 (m, 2H), 7.39–7.28 (m, 3H), 5.48 (q,  $J$  = 1.0 Hz, 1H), 5.36 (q,  $J$  = 1.4 Hz, 1H), 4.56 (ddd,  $J$  = 6.2, 1.4, 0.8 Hz, 2H), 1.55 (d,  $J$  = 4.5 Hz, 1H).  $[\alpha]_D^{20}$  = –6.8°. **MS**: Exact mass calculated for mass [C<sub>9</sub>H<sub>10</sub>O<sub>2</sub> + H]<sup>+</sup> requires  $m/z$  = 151.08; found 151.08.

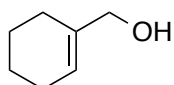

**Cyclohex-1-en-1-ylmethanol (SI 6)**: Prepared from the corresponding ester using SI-2.3.  $R_f$  = 0.5 (40% EtOAc in hexanes, CAM stain). Material was chromatographed with 40% Et<sub>2</sub>O in pentane. **<sup>1</sup>H NMR** (400 MHz, CDCl<sub>3</sub>)  $\delta$  5.68 (broad s, 1H), 3.98 (d,  $J$  = 1.6 Hz, 2H), 2.02 (m, 4H), 1.71–1.50 (m, 4H), 0.92 (d,  $J$  = 6.7 Hz, 1H). **MS**: Exact mass calculated for mass [C<sub>7</sub>H<sub>12</sub>O + H]<sup>+</sup> requires  $m/z$  = 113.10; found 113.04.

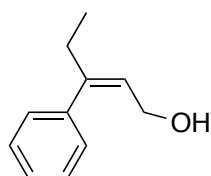

**(Z)-3-Phenylpent-2-en-1-ol (SI 7)**: Prepared from the corresponding ester using SI-2.3.  $R_f$  = 0.4 (40% EtOAc in hexanes, UV, CAM stain). Material was chromatographed with 40% Et<sub>2</sub>O in pentane. **<sup>1</sup>H NMR** (400 MHz, CDCl<sub>3</sub>)  $\delta$  7.39–7.22 (m, 3H), 7.16–7.07 (m, 2H), 5.66 (tt,  $J$  = 7.0, 1.4 Hz, 1H), 4.03 (dt,  $J$  = 6.9, 1.0 Hz, 2H), 2.39 (qq,  $J$  = 7.1, 1.1 Hz, 2H), 1.60–1.47 (m, 1H), 0.99 (t,  $J$  = 7.4 Hz, 3H). **MS**: Exact mass calculated for mass [C<sub>11</sub>H<sub>14</sub>O + H]<sup>+</sup> requires  $m/z$  = 163.11; found 163.09.

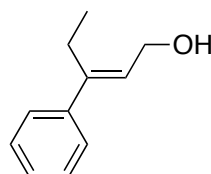

**(E)-3-Phenylpent-2-en-1-ol (SI 8)**: Prepared from the corresponding ester using SI-2.3.  $R_f$  = 0.3 (20% EtOAc in hexanes, UV, CAM stain). Material was chromatographed with 40% Et<sub>2</sub>O in pentane. **<sup>1</sup>H NMR** (400 MHz, CDCl<sub>3</sub>)  $\delta$  7.56–7.07 (m, 5H), 5.83 (t,  $J$  = 6.8 Hz, 1H), 4.34 (d,  $J$  = 6.8 Hz, 2H), 2.53 (q,  $J$  = 7.5 Hz, 2H), 1.87–1.66 (m, 1H), 0.98 (t,  $J$  = 7.6 Hz, 3H). **MS**: Exact mass calculated for mass [C<sub>11</sub>H<sub>14</sub>O + H]<sup>+</sup> requires  $m/z$  = 163.11; found 163.08.

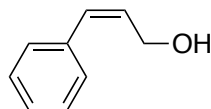

**(Z)-3-Phenylprop-2-en-1-ol (SI 9)**: Prepared from the corresponding ester using SI-2.3.  $R_f$  = 0.3 (30% EtOAc in hexanes, UV, CAM stain). Material was chromatographed with a gradient of 10% to 20% to 30% Et<sub>2</sub>O in pentane. **<sup>1</sup>H NMR** (400 MHz, CDCl<sub>3</sub>)  $\delta$  7.58–6.90 (m, 5H), 6.54 (dt,  $J$  = 11.8, 1.8 Hz, 1H), 5.85 (dt,  $J$  = 11.7, 6.4 Hz, 1H), 4.41 (dd,  $J$  = 6.4, 1.7 Hz, 2H), 2.10 (s, 1H). **MS**: Exact mass calculated for mass [C<sub>9</sub>H<sub>10</sub>O – OH]<sup>+</sup> requires  $m/z$  = 117.07; found 117.04.

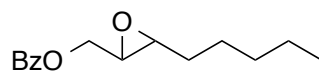 **(3-Pentyloxiran-2-yl)methyl benzoate (SI 10):** Prepared from corresponding alcohol using SI-2.4.  $R_f = 0.5$  (40% EtOAc in hexanes, UV, CAM stain).  $^1\text{H NMR}$  (500 MHz,  $\text{CDCl}_3$ )  $\delta$  8.10–8.04 (m, 2H), 7.61–7.54 (m, 1H), 7.49–7.41 (m, 2H), 4.60 (dd,  $J = 12.2, 3.4$  Hz, 1H), 4.20 (dd,  $J = 12.2, 6.2$  Hz, 1H), 3.14–3.07 (m, 1H), 2.94 (td,  $J = 5.6, 2.2$  Hz, 1H), 1.63–1.57 (m, 1H), 1.48 (dq,  $J = 11.5, 7.8, 7.3$  Hz, 2H), 1.38–1.28 (m, 5H), 0.94–0.84 (m, 3H). **MS:** Exact mass calculated for mass  $[\text{C}_{15}\text{H}_{20}\text{O}_3 + \text{H}]^+$  requires  $m/z = 249.15$ ; found 249.15.

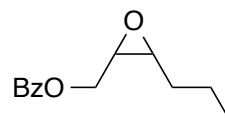 **(3-Propyloxiran-2-yl)methyl benzoate (SI 11):** Prepared from corresponding alcohol using SI-2.4.  $R_f = 0.5$  (100% DCM, UV, CAM stain).  $^1\text{H NMR}$  (400 MHz,  $\text{CDCl}_3$ )  $\delta$  8.12–8.05 (m, 2H), 7.64–7.52 (m, 1H), 7.50–7.40 (m, 2H), 4.58 (dd,  $J = 12.1, 4.3$  Hz, 1H), 4.30 (dd,  $J = 12.1, 7.0$  Hz, 1H), 3.33 (dt,  $J = 7.1, 4.3$  Hz, 1H), 3.08 (td,  $J = 6.1, 4.3$  Hz, 1H), 1.72–1.41 (m, 4H), 1.06–0.88 (m, 3H). **MS:** Exact mass calculated for mass  $[\text{C}_{13}\text{H}_{16}\text{O}_3 + \text{H}]^+$  requires  $m/z = 221.12$ ; found 221.12.

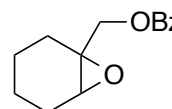 **(7-Oxabicyclo[4.1.0]heptan-1-yl)methyl benzoate (SI 12):** Prepared from corresponding alcohol using SI-2.4.  $R_f = 0.2$  (100% DCM, UV, CAM stain).  $^1\text{H NMR}$  (400 MHz,  $\text{CDCl}_3$ )  $\delta$  8.12–7.94 (m, 2H), 7.62–7.54 (m, 1H), 7.50–7.38 (m, 2H), 4.47 (d,  $J = 11.9$  Hz, 1H), 4.19 (d,  $J = 11.9$  Hz, 1H), 3.21 (dt,  $J = 3.6, 1.1$  Hz, 1H), 2.11–1.81 (m, 4H), 1.48 (tdt,  $J = 9.6, 7.6, 5.3$  Hz, 2H), 1.36–1.19 (m, 2H). **MS:** Exact mass calculated for mass  $[\text{C}_{14}\text{H}_{16}\text{O}_3 + \text{H}]^+$  requires  $m/z = 233.12$ ; found 233.11.

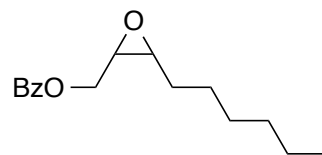 **(3-Hexyloxiran-2-yl)methyl benzoate (SI 13):** Prepared from corresponding alcohol using SI-2.4.  $R_f = 0.5$  (100% DCM, UV, CAM stain).  $^1\text{H NMR}$  (400 MHz,  $\text{CDCl}_3$ )  $\delta$  8.05–7.96 (m, 2H), 7.51 (ddt,  $J = 7.9, 6.9, 1.4$  Hz, 1H), 7.43–7.32 (m, 2H), 4.57–4.44 (m, 1H), 4.24 (dd,  $J = 12.1, 7.0$  Hz, 1H), 3.26 (dt,  $J = 7.0, 4.3$  Hz, 1H), 3.00 (ddd,  $J = 6.7, 5.8, 4.3$  Hz, 1H), 1.63–1.15 (m, 10H), 0.82 (td,  $J = 5.7, 4.8, 2.2$  Hz, 3H). **MS:** Exact mass calculated for mass  $[\text{C}_{16}\text{H}_{22}\text{O}_3 + \text{H}]^+$  requires  $m/z = 263.16$ ; found 263.16.

**Table SI1: HPLC Conditions**

| Substrate                                                                           | Column <sup>a</sup> | Conditions                                                                                                |
|-------------------------------------------------------------------------------------|---------------------|-----------------------------------------------------------------------------------------------------------|
| 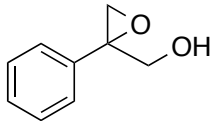   | Chiralcel AS-H      | 5% <i>i</i> PrOH in hexanes, 1.0 mL/min, 40 min<br>Major: 15.1 min, Minor: 23.0 min<br>Observed at 210 nm |
|    | Chiralcel AD-H      | 7% EtOH in hexanes, 1.0 mL/min, 20 min<br>Minor: 8.2 min, Major: 9.7 min<br>Observed at 210 nm            |
|    | Chiralcel OJ-H      | 1% <i>i</i> PrOH in hexanes, 1.0 mL/min, 20 min<br>Minor: 11.1 min, Major: 12.9 min<br>Observed at 230 nm |
|    | Chiralcel OJ        | 10% <i>i</i> PrOH in hexanes, 1.0 mL/min, 20 min<br>Major: 9.4 min, Minor: 13.6 min<br>Observed at 210 nm |
|  | Chiralcel OD-H      | 7% <i>i</i> PrOH in hexanes, 1.0 mL/min, 20 min<br>Minor: 10.7 min, Major: 13.9 min<br>Observed at 230 nm |
|  | Chiralcel OJ-H      | 7% <i>i</i> PrOH in hexanes, 1.0 mL/min, 20 min<br>Minor: 11.0 min, Major: 12.9 min<br>Observed at 210 nm |
|  | Chiralcel OJ-H      | 1% <i>i</i> PrOH in hexanes, 1.0 mL/min, 20 min<br>Major: 8.4 min, Minor: 9.9 min<br>Observed at 230 nm   |
|  | Chiralcel AD-H      | 1% <i>i</i> PrOH in hexanes, 1.0 mL/min, 20 min<br>Minor: 8.6 min, Major: 10.2 min<br>Observed at 230 nm  |
|  | Chiralcel OJ-H      | 1% <i>i</i> PrOH in hexanes, 1.0 mL/min, 20 min<br>Major: 8.5 min, Minor: 14.8 min<br>Observed at 230 nm  |

|                                                                                   |                   |                                                                                                          |
|-----------------------------------------------------------------------------------|-------------------|----------------------------------------------------------------------------------------------------------|
| 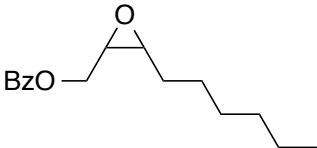 | Chiralcel<br>OJ-H | 1% <i>i</i> PrOH in hexanes, 1.0 mL/min, 20 min<br>Minor: 8.4 min, Major: 10.0 min<br>Observed at 230 nm |
|-----------------------------------------------------------------------------------|-------------------|----------------------------------------------------------------------------------------------------------|

<sup>a</sup>All columns used have the dimensions 4.6 mm  $\Phi$   $\times$  250 mm

## 4. General Protocols for Truncated Peptide Synthesis

**4.1 Solution peptide synthesis.** To peptide acid (1 equiv) was added amine coupling partner (1.0-1.1 equiv), EDC•HCl (1.1 equiv), HOBt•H<sub>2</sub>O (1.1 equiv), and DCM (to 0.1 M in peptide acid). *i*Pr<sub>2</sub>EtN or Et<sub>3</sub>N (1.2 equiv) was also added if the amine coupling partner was the hydrochloride salt. The resulting solution was allowed to stir until the reaction was deemed complete as determined by LCMS, usually 3-48 h. The reaction solution was diluted with additional DCM and then washed with aqueous 0.5 M citric acid, half-saturated brine, and sat. aq. NaHCO<sub>3</sub>. The combined organics were dried over Na<sub>2</sub>SO<sub>4</sub>, filtered, and concentrated.

**4.2 Solid phase peptide coupling protocol.** To pre-swollen resin was added Fmoc-protected amino acid (3 equiv), HBTU (3 equiv), HOBt•H<sub>2</sub>O (3 equiv) with DMF, followed by *i*Pr<sub>2</sub>EtN (6 equiv). The resin mixture was sealed and mixed for 3-6 h on a rotary mixer and then drained, washing with a combination of DMF, DCM, and/or CH<sub>3</sub>OH. If required for the next coupling, the Fmoc-protecting group was removed with two treatments of 20% piperidine in DMF (v/v) for 20 min each.

**4.3 Standard Fm-ester deprotection.** To protected peptide was added 1:1 (v/v) solution of Et<sub>2</sub>NH and DCM. The resulting solution was swirled occasionally over the course of 30-60 min before concentrating via rotary evaporator. The resulting material was dissolved in DCM and then concentrated further. Typically, the crude material was loaded on a silica gel column as a solution in DCM, where it was eluted with a gradient of 1% CH<sub>3</sub>OH to 4% CH<sub>3</sub>OH in 1% AcOH/DCM.

## 5. Synthesis and Characterization of Truncated Peptides

Synthesis of peptides **23** and **24** began from common intermediate **SI-1** (SI Figure 1), which was synthesized starting with 2-chlorotrityl resin, preloaded with Asn(Trt), and then coupling the appropriate amino acid monomers (Fmoc-Pro-OH and then Boc-Asp(OFm)-OH) using the Solid Phase Peptide Coupling protocol. Resin was cleaved with a 4:1:1 mixture of DCM: 2,2,2-trifluoroethanol: acetic acid, treating for 30-60 min before draining. The resulting solution, along with washes, was concentrated a couple of times with additional toluene. The concentrated material was purified by eluting through a silica gel column with a gradient of 1% CH<sub>3</sub>OH/1% AcOH to 4% CH<sub>3</sub>OH/1% AcOH in DCM. Collection and concentration resulted in a flaky solid with a light brownish color.

**SI Figure 1.**

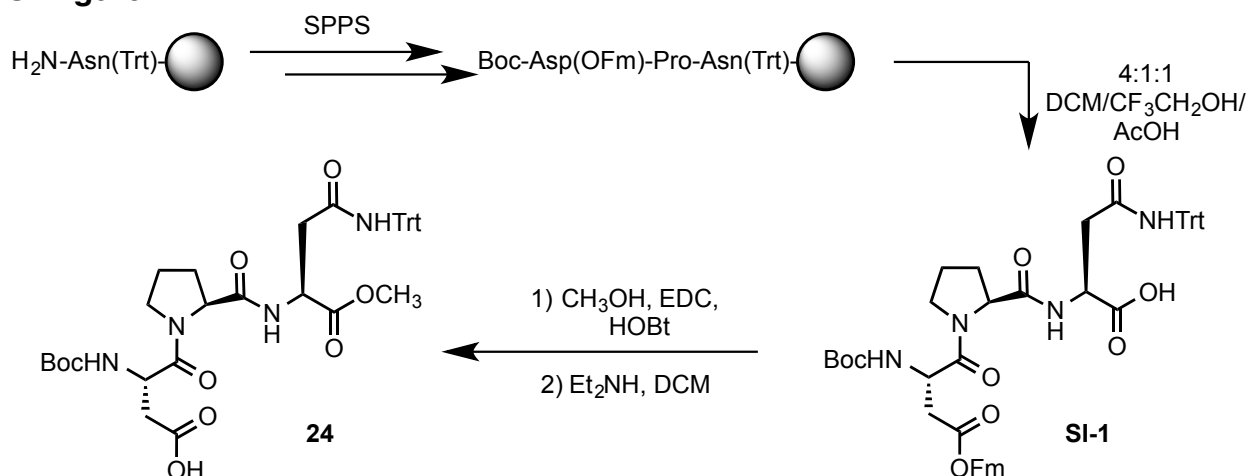

Intermediate **SI-1** was coupled to  $\text{CH}_3\text{OH}$ , which was used as co-solvent with DCM using the Solution Peptide Synthesis protocol. After work-up, the crude material was deprotected using the Standard Fm-ester Deprotection protocol, and upon concentration, was purified with a silica gel column eluted with a gradient of 1% to 4%  $\text{CH}_3\text{OH}$  in 1%  $\text{AcOH/DCM}$  (as described in the standard protocol). A portion of this material was further purified by reverse phase chromatography using a Biotage C18 column eluting with a gradient of 40%  $\text{CH}_3\text{OH}$  to 100%  $\text{CH}_3\text{OH}$  in water with 0.1% formic acid.

Peptide **24**: White solid. **TLC**: 5%  $\text{CH}_3\text{OH}$ , 1%  $\text{AcOH}$  in DCM ( $R_f = 0.38$ ), visualized by UV,  $\text{I}_2/\text{silica}$ , and CAM stain.  **$^1\text{H NMR}$**  (500 MHz,  $\text{CDCl}_3$ , 20 mM):  $\delta$  7.33 (d,  $J = 8.1$  Hz, 1H), 7.30 – 7.21 (m, 9H), 7.20 – 7.13 (m, 6H), 7.10 (s, 1H), 5.20 (d,  $J = 8.7$  Hz, 1H), 4.78 (dt,  $J = 12.7$ , 6.2 Hz, 1H), 4.62 (dt,  $J = 8.0$ , 5.0 Hz, 1H), 4.48 (dd,  $J = 8.4$ , 3.3 Hz, 1H), 3.77 (t,  $J = 6.7$  Hz, 2H), 3.64 (s, 3H), 2.98 – 2.89 (m,  $J = 4.6$  Hz, 2H), 2.85 (dd,  $J = 16.5$ , 9.6 Hz, 1H), 2.61 (dd,  $J = 16.3$ , 4.5 Hz, 1H), 2.17 – 2.10 (m, 1H), 2.10 – 1.99 (m, 1H), 1.99 – 1.86 (m, 2H), 1.43 (s, 9H).  **$^{13}\text{C NMR}$**  (126 MHz,  $\text{CDCl}_3$ ):  $\delta$  172.6, 171.7, 171.3, 171.1, 169.9, 155.1, 144.3, 128.8, 128.1, 127.3, 80.5, 71.1, 60.7, 52.8, 49.6, 48.3, 47.6, 38.7, 37.8, 29.3, 28.5, 24.5. **IR** (film in/from DCM,  $\text{cm}^{-1}$ ): 3318, 2977, 1711, 1648, 1510, 1492, 1446, 1367, 1162. **HRMS**: calculated mass for  $[\text{C}_{38}\text{H}_{44}\text{N}_4\text{O}_9 + \text{H}]^+$  requires  $m/z = 701.3181$ , ESI+ found 701.3165.

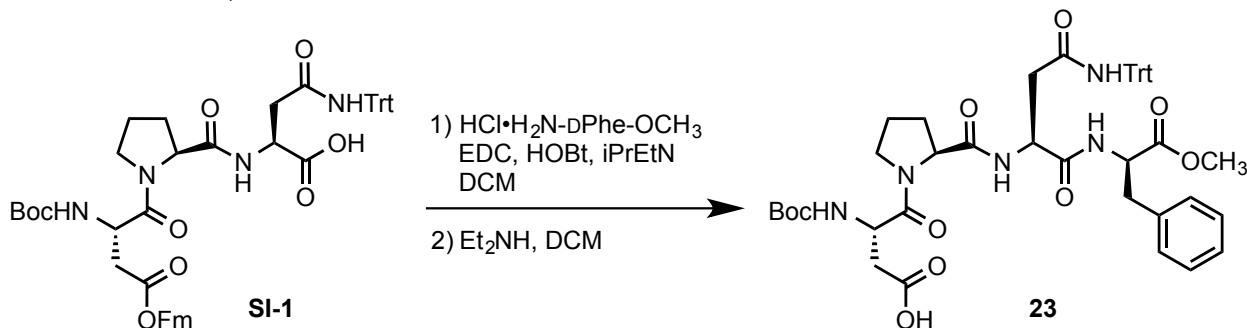

Intermediate **SI-1** was coupled to  $\text{HCl} \cdot \text{H-DPhe-OCH}_3$  using the Solution Peptide Synthesis protocol. After work-up, the crude material was deprotected using the Standard Fm-ester Deprotection protocol, and upon concentration, was purified with a

silica gel column eluted with a gradient of 1% to 3% CH<sub>3</sub>OH in 1% AcOH/DCM (as described in the standard protocol). A portion of this material was further purified by reverse phase chromatography using a Biotage C18 column eluting with a gradient of 40% CH<sub>3</sub>CN to 100% CH<sub>3</sub>CN in water with 0.1% formic acid. This material was used for characterization and for one of the two reactions with farnesol.

Peptide **23**: white solid. **TLC**: 5% CH<sub>3</sub>OH, 1% AcOH in DCM (*R<sub>f</sub>* = 0.42) visualized by UV, I<sub>2</sub>/silica, and CAM stain. **<sup>1</sup>H NMR** (600 MHz, CDCl<sub>3</sub>): δ 7.43 – 7.32 (m, 2H, estimated), 7.30 – 7.16 (m, 16H, estimated based on zTOCSY and expected integration), 7.16 – 7.10 (m, 6H), 5.29 (d, *J* = 9.1 Hz, 1H), 4.74 (td, *J* = 8.7, 4.4 Hz, 1H), 4.69 (td, *J* = 7.8, 4.9 Hz, 1H), 4.54 (dt, *J* = 8.2, 6.9 Hz, 1H), 4.44 (dd, *J* = 8.6, 4.7 Hz, 1H), 3.72 – 3.65 (m, 1H), 3.61 (s, 3H), 3.58 – 3.49 (m, 1H), 3.12 – 3.02 (m, part of an unresolved ABX pattern 2H), 2.88 (dd, *J* = 15.8, 8.5 Hz, 1H), 2.84 – 2.73 (m, part of an unresolved ABX pattern, 2H), 2.66 (dd, *J* = 15.8, 4.6 Hz, 1H), 2.19 – 2.10 (m, 1H), 2.01 – 1.92 (m, 1H), 1.88 – 1.79 (m, 1H), 1.79 – 1.69 (m, 1H), 1.43 (s, 9H). **<sup>13</sup>C NMR** (151 MHz, 20 mM in CDCl<sub>3</sub>): δ 173.6, 172.5, 171.5, 171.2, 170.9, 169.9, 155.0, 144.4, 136.3, 129.4, 128.8, 128.6, 128.0, 127.1, 127.1, 80.5, 70.9, 61.6, 55.0, 52.7, 50.2, 48.8, 47.8, 38.6, 37.5, 37.2, 29.4, 28.4, 24.8. Other less intense peaks possibly from another conformer or an impurity were also identified: δ 133.1, 129.8, 128.5, 69.4, 64.1. **IR** (film in/from DCM, cm<sup>-1</sup>): 3312, 1712, 1666, 1635, 1511, 1493, 1446, 1367, 1266, 1249, 1213, 1162. **HRMS**: calculated mass for [C<sub>47</sub>H<sub>53</sub>N<sub>5</sub>O<sub>10</sub>+H]<sup>+</sup> requires *m/z* = 848.3865, ESI+ found 848.3868.

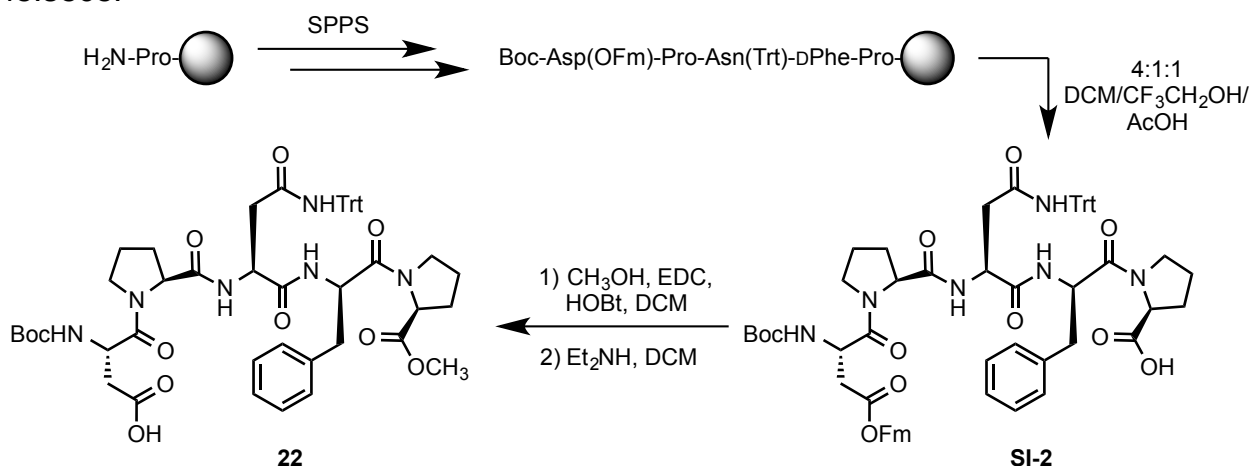

Peptide **22** was synthesized starting with 2-chlorotrityl resin preloaded with proline, and then coupling the appropriate amino acid monomers (Fmoc-DPhe-OH, Fmoc-Asn(Trt)-OH, Fmoc-Pro-OH, and then Boc-Asp(OFm)-OH) using the Solid Phase Peptide Coupling protocol. Resin was cleaved with a 4:1:1 mixture of DCM: 2,2,2-trifluoroethanol: acetic acid, treating for about 1 h before draining. The resulting solution, along with washes, was concentrated a couple of times with additional toluene. The concentrated material was purified by eluting through a silica gel column with a gradient of 1% CH<sub>3</sub>OH/1% AcOH to 4% CH<sub>3</sub>OH/1% AcOH in DCM. The fractions were then collected and concentrated to afford **SI-2**.

Intermediate **SI-2** was coupled to CH<sub>3</sub>OH, which was used as solvent along with DCM (1:1 CH<sub>3</sub>OH:DCM to ca. 0.05 M) using the Solution Peptide Synthesis protocol. After work-up, the crude material was deprotected using the Standard Fm-ester Deprotection protocol, and upon concentration, was purified with a silica gel column eluting with a gradient of 1% to 4% CH<sub>3</sub>OH in 1% AcOH/DCM (as described in the standard protocol). A portion of this material was further purified by reverse phase chromatography using a Biotage C18 column eluting with a gradient of 10% CH<sub>3</sub>CN to 100% CH<sub>3</sub>CN in water with 0.1% formic acid. This material was used for characterization and for one of the two reactions with farnesol.

Peptide **22**: white solid. **TLC**: 5% CH<sub>3</sub>OH, 1% AcOH in DCM (*R<sub>f</sub>* = 0.42), visualized by UV, I<sub>2</sub>/silica, and CAM stain. NMR indicates a mixture of species that are present in a mixture of approximately 7:3, which we suspect to be rotamers. Although, we cannot exclude the possibility of epimers, the material appears as a single peak by UPLC. Furthermore, the proton chemical shift data are consistent with what might be observed for amide rotamers about the *i*+4 D<sup>+</sup>Phe and *i*+5 Pro. Variable temperature 1D NMR studies from ambient temperature to 60 °C in CDCl<sub>3</sub> were inconclusive, although two sets of peaks assigned to *NH*-Asp and  $\alpha$ -Asn(Trt) did seem to coalesce, which suggests that there may be additional rotamers present. Data for the major isomer is as follows, where the assignment of integration values was assisted by zTOCSY and the peak assignments were made by referencing gCOSY, zTOCSY, and HMBC: **<sup>1</sup>H NMR** (600 MHz, CDCl<sub>3</sub>):  $\delta$  7.46 (s, 1H, Asn(*NH*)), 7.34 – 7.16 (m, 19H), 7.16 – 7.11 (m, 2H), 7.04 (d, *J* = 8.3 Hz, 1H), 5.47 (d, *J* = 9.2 Hz, 1H), 4.85 – 4.79 (m, 1H,  $\alpha$ -Asp), 4.76 (td, *J* = 8.6, 4.9 Hz, 1H,  $\alpha$ -Asn(Trt)), 4.63 (dt, *J* = 10.1, 6.2 Hz, 1H,  $\alpha$ -D<sup>+</sup>Phe), 4.44 (dd, *J* = 8.7, 5.1 Hz, 1H,  $\alpha$ -Pro(2)), 4.24 – 4.18 (m, 1H,  $\alpha$ -Pro(5), overlaps with peak from minor isomer  $\alpha$ -D<sup>+</sup>Phe), 3.87 – 3.80 (m, 1H,  $\delta$ -Pro(5)), 3.70 – 3.65 (m, 1H,  $\delta$ -Pro(2)), 3.65 – 3.58 (m, 1H,  $\delta$ -Pro(2)) overlaps with peak from minor isomer 2  $\delta$ -Pro(5)), 3.57 (s, 3H), 3.16 – 3.03 (m, 2H,  $\beta$ -D<sup>+</sup>Phe), 2.98 – 2.85 (m, 2H,  $\beta$ -Asn/Asp), 2.77 – 2.69 (m, 1H,  $\beta$ -Asp), 2.67 – 2.59 (m, 2H,  $\beta$ -Asn and  $\delta$ -Pro(5)), 2.23 – 2.11 (m, 1H,  $\beta$ -Pro(2), overlaps with peak from minor isomer 2  $\beta$ -Pro(5)), 2.00 – 1.71 (m, 6H), 1.55 – 1.47 (m, 1H), 1.40 (s, 9H). Peaks with different chemical shifts assigned to the minor isomer are as follows: 6.99 (d, *J* = 8.8 Hz, 1H, *NH*-Asn), 5.52 (d, *J* = 9.2 Hz, 1H, *NH*-Asp), 5.20 (dd, *J* = 7.9, 3.1 Hz, 1H,  $\alpha$ -Pro(5)), 4.71 (dt, *J* = 8.5, 4.2 Hz, 1H,  $\alpha$ -Asn(Trt)), 4.48 (dd, *J* = 8.7, 4.8 Hz, 1H,  $\alpha$ -Pro(2)), 3.72 (s, 3H), 1.42 (s, 3H). **<sup>13</sup>C NMR** (151 MHz, CDCl<sub>3</sub>):  $\delta$  173.8, 173.6, 172.7, 172.5, 172.1, 171.6, 171.3, 171.3, 170.6, 170.3, 169.0, 168.9, 155.2, 155.1, 144.7, 144.7, 137.1, 136.2, 129.5, 129.4, 128.9, 128.8, 128.7, 128.6, 128.0, 128.0, 127.3, 127.1, 127.0, 80.5, 70.7, 61.9, 61.8, 60.0, 59.5, 54.7, 53.8, 52.8, 52.3, 50.7, 50.0, 49.2, 47.7, 47.5, 47.4, 47.3, 39.5, 37.7, 37.6, 37.5, 36.6, 31.3, 29.6, 29.5, 29.0, 28.4, 28.4, 24.9, 24.8, 24.4, 22.6. **IR** (film in/from DCM, cm<sup>-1</sup>): 3326, 3058, 3030, 2977, 2879, 1750, 1713, 1676, 1656, 1626, 1518, 1482, 1447, 1366, 1276, 1249, 1197, 1172. **HRMS**: calculated mass for [C<sub>52</sub>H<sub>60</sub>N<sub>6</sub>O<sub>11</sub>+H]<sup>+</sup> requires *m/z* = 945.4393, ESI+ found 945.4398.



## 6. Kinetics

### 6.1 Procedure for Determining Response Factor ( $f_r$ ) of Dodecane Internal Standard:

Three standard solutions of *cis*-hex-2-en-1-ol and dodecane in  $\text{CHCl}_3$  (filtered through basic  $\text{Al}_2\text{O}_3$  prior to mixing with substrates) were prepared in a 10.00 mL volumetric flask. The 1:1 solution was prepared with 0.0545 mL of dodecane (0.250 mmol) and 0.030 mL of *cis*-hex-2-en-1-ol (0.250 mmol). The 2:1 solution was prepared with 0.055 mL of dodecane (0.250 mmol) and 0.015 mL of *cis*-hex-2-en-1-ol (0.125 mmol). Finally, the 4:1 solution was prepared with 0.055 mL of dodecane (0.250 mmol) and 0.0074 mL of *cis*-hex-2-en-1-ol (0.063 mmol). An aliquot of each standard solution was dissolved in hexanes and analyzed by GC. The formula

$$f_r = \left( \frac{[\text{standard}]}{[\text{analyte}]} \right) \left( \frac{\text{area}_{\text{analyte}}}{\text{area}_{\text{standard}}} \right)$$

was evaluated and the value was used to calculate the concentration of *cis*-hex-2-en-1-ol in the reaction mixture during various time points (procedure detailed below). The average  $f_r$  was found to be  $0.38 \pm 0.04$ .

### 6.2 Procedure for Gathering Kinetics Data

**Gas Chromatographic Method:** 250 °C inlet, 280 °C detector, flow 1.5 mL/min, oven temperature program: 60 °C for 2 min; 2 °C/min ramp to 112 °C; 10 °C/min ramp to 170 °C; hold at 170 °C for 2 min. *cis*-Hex-2-en-1-ol appears at 6.10 min and dodecane appears at 22.1 min.

**With peptide catalyst:** A standard solution of 4-dimethylamino pyridine (0.024 g, 0.20 mmol), hydroxybenzotriazole (0.031 g, 0.20 mmol), dodecane (0.436 mL, 2.00 mmol), and *cis*-hex-2-en-1-ol (0.236 mL, 2.00 mmol) in  $\text{CDCl}_3$  (10.00 mL, filtered through basic  $\text{Al}_2\text{O}_3$ ) was prepared in a volumetric flask. Eight 2 dram vials were fitted with Teflon-coated stir bars and caps. Each vial was charged with peptide catalyst (0.020 g, 0.016 mmol). Aliquots of the standard solution (0.780 mL) were delivered to each of the eight vials. An aqueous 30% w/w solution of  $\text{H}_2\text{O}_2$  (0.035 mL, 0.34 mmol) was delivered via micropipette and each vial was placed in an ice bath. *N,N'*-Diisopropylcarbodiimide (DIC) (0.025 mL, 0.16 mmol) was added to each vial and the time was noted. A single aliquot from each vial was taken at the 8 time points throughout the course of the reaction from 5 minutes after the addition of DIC until 7 h after its addition. The aliquots were passed through a plug of solid sodium sulfite with dichloromethane and analyzed via GC. The concentration of *cis*-hex-2-en-1-ol at each time point was determined from the formula

$$[\text{analyte}] = \left( \frac{[\text{standard}]}{f_r} \right) \left( \frac{\text{area}_{\text{analyte}}}{\text{area}_{\text{standard}}} \right)$$

where  $f_r=0.38$ .

**Table SI2: Raw Kinetics Data from Reaction with Peptide**

| Time (min) | Hex-2-en-1-ol (area) | [hex-2-en-1-ol] (M) | Dodecane (area) | ln[hexenol] |
|------------|----------------------|---------------------|-----------------|-------------|
| 5          | 831.93               | 0.18                | 2371.55         | -1.69       |
| 10         | 919.26               | 0.17                | 2796.77         | -1.76       |
| 15         | 865.99               | 0.17                | 2739.44         | -1.80       |
| 30         | 787.30               | 0.14                | 2902.61         | -1.95       |
| 60         | 584.72               | 0.10                | 3145.62         | -2.33       |
| 120        | 183.56               | 0.03                | 3076.86         | -3.46       |
| 240        | 32.31                | 0.01                | 2892.94         | -5.14       |
| 420        | 31.89                | 0.01                | 2902.69         | -5.16       |

**Plot SI1: Resulting Plot from Kinetics Data from Reaction with Peptide**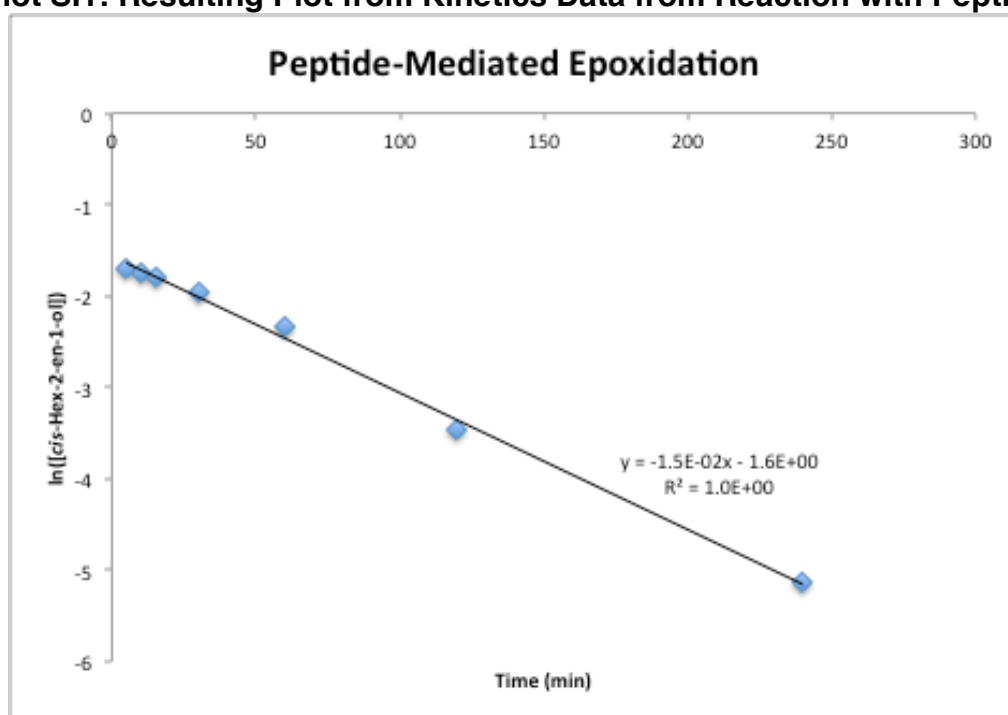

**With propionic acid:** A standard solution of 4-dimethylamino pyridine (0.200 mmol, 0.0244 g), hydroxybenzotriazole (0.200 mmol, 0.0306 g), propionic acid (0.200 mmol, 0.0149 mL), dodecane (2.00 mmol, 0.436 mL), and *cis*-hex-2-en-1-ol (2.00 mmol, 0.236 mL) in CDCl<sub>3</sub> (10.00 mL, filtered through basic Al<sub>2</sub>O<sub>3</sub>) was prepared in a volumetric flask. Eight, 2 dram vials were fitted with Teflon-coated stir bars and caps. Each vial was charged with peptide catalyst (0.0156 mmol, 0.0203 g). Aliquots of the standard solution (0.780 mL) were delivered to each of the eight vials. An aqueous 30% w/w solution of H<sub>2</sub>O<sub>2</sub> (0.343 mmol, 0.0354 mL) was delivered via micropipette and each vial was placed in an ice bath. *N,N'*-Diisopropylcarbodiimide (DIC) (0.156 mmol, 0.0245 mL) was added to each vial and the time was noted. A single aliquot from each vial was taken at the 8 time points throughout the course of the reaction from 5 minutes after the addition of DIC until 7 h after its addition. The aliquots were passed through a plug of solid sodium

sulfite with dichloromethane and analyzed via GC. The concentration of *cis*-hex-2-en-1-ol at each time point was determined from the formula

$$[\text{analyte}] = \left( \frac{[\text{standard}]}{f_r} \right) \left( \frac{\text{area}_{\text{analyte}}}{\text{area}_{\text{standard}}} \right)$$

where  $f_r=0.38$ .

**Table SI3: Raw Kinetics Data from Reaction with Propionic Acid**

| Time (min) | Hex-2-en-1-ol (area) | [hex-2-en-1-ol] (M) | Dodecane (area) | ln[hexenol] |
|------------|----------------------|---------------------|-----------------|-------------|
| 5          | 964.81               | 0.21                | 2419.12         | -1.56       |
| 10         | 803.93               | 0.20                | 2070.28         | -1.59       |
| 15         | 714.33               | 0.21                | 1818.58         | -1.58       |
| 30         | 1253.36              | 0.20                | 3211.47         | -1.59       |
| 60         | 773.12               | 0.20                | 1995.17         | -1.59       |
| 154        | 996.03               | 0.20                | 2590.50         | -1.60       |
| 240        | 768.95               | 0.20                | 2046.45         | -1.62       |
| 420        | 778.29               | 0.19                | 2156.35         | -1.66       |

**Plot SI2: Resulting Plot from Kinetics Data from Reaction with Propionic Acid**

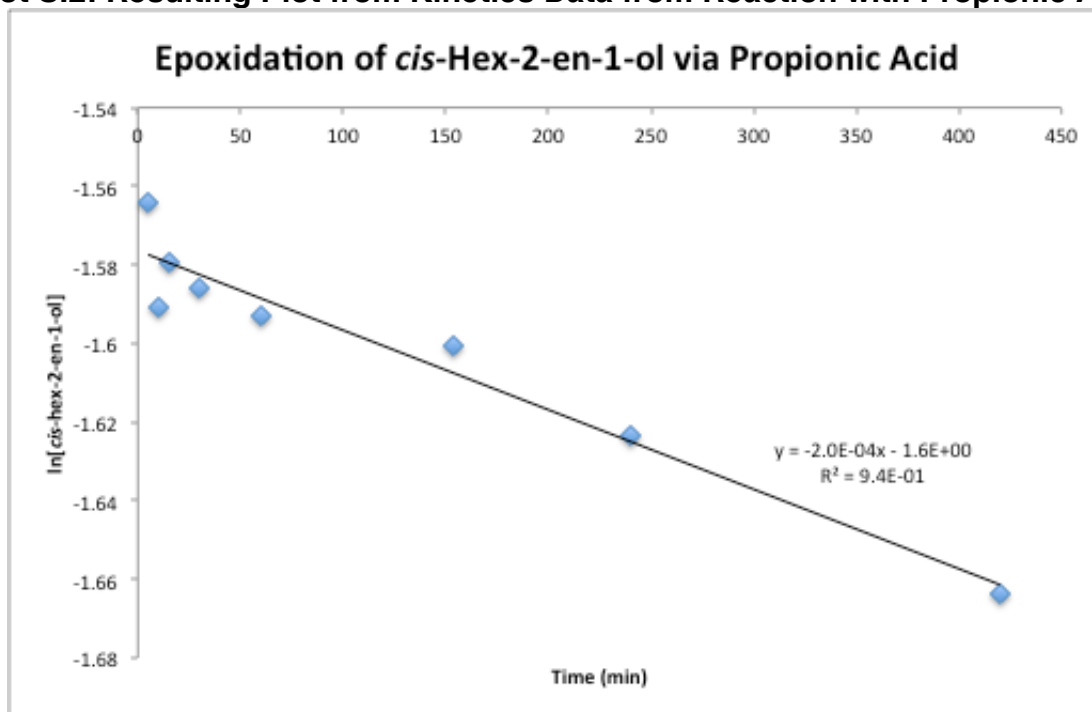

## 7. NMR Experiments

**Data acquired for the Peptide 6:** Proton, gCOSY, zTOCSY, and ROESY experiments that were used to supply data for the NMR structure elucidation of **6** were collected on a Varian Inova 500 MHz spectrometer equipped with VnmrJ 2.2D. The pulse sequences for all experiments were provided by Varian. The sample was prepared in CDCl<sub>3</sub> (with TMS as reference) to afford peptide in a 0.02 M solution, the concentration of the peptide during the epoxidation reaction.

ROESY data was acquired at 25 °C with a 275 ms mixing time, spectral width of 5102.4 Hz, 128 transients, and d1 of 2.9 s. In the f2 dimension, 765 points were collected and 487 points were collected in the f1 dimension. The data was processed with Mestrenova v8.1.1-11591. Zero filling sized the spectrum to 1024, 1024. Automatic phasing was used along with manual adjustments and apodization was carried out with a sine bell function. The spectrum was treated with an automatic baseline correction with a polynomial fit.

The conditions of the other NMR experiments are tabulated below.

**Table SI3: NMR Experiment Conditions**

| Sample           | Experiment | Sample Concentration (M) | Solvent                    | Points in f1 | Points in f2 |
|------------------|------------|--------------------------|----------------------------|--------------|--------------|
| Peptide <b>6</b> | zTOCSY     | 0.02                     | CDCl <sub>3</sub> (w/ TMS) | 487          | 765          |
|                  | gCOSY      |                          |                            | 239          | 765          |

### <sup>1</sup>H types in peptide 6:

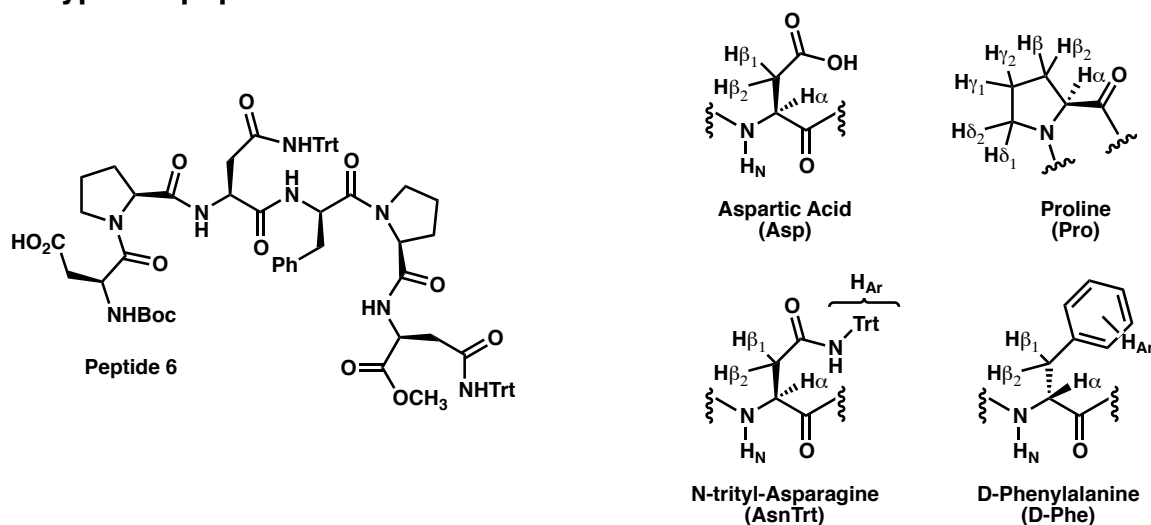

Diastereotopic protons (e.g. H<sub>γ1</sub> and H<sub>γ2</sub> of proline) were designated 1 and 2 such that proton 2 had the further downfield chemical shift. In the case of overlap, the resonances are referred to as a single peak (e.g. H<sub>γ12</sub>).

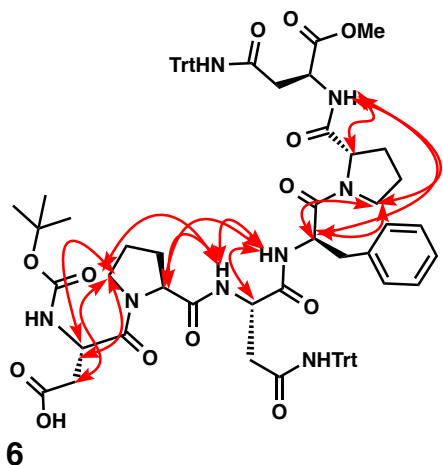

Peptide **6**  $^1\text{H}$  NMR (500 MHz,  $\text{CDCl}_3$ ):  $\delta$  7.52 (s, 1H,  $\text{D-Phe}(4)\text{NH}$ ), 7.43 (d,  $J = 7.5$  Hz, 1H,  $\text{Asn}(6)\text{NH}$ ), 7.36-7.05 (m, 40H, aryl protons from two  $\text{Asn}(\text{Trt})$  residues,  $\text{D-Phe}(4)$  RNH from two  $\text{Asn}(\text{Trt})$  residues), 6.96 (d,  $J = 8.0$  Hz, 1H,  $\text{Asn}(3)\text{NH}$ ), 5.35 (s, 1H,  $\text{Asp}(1)\text{NH}$ ), 4.84 (s, 2H,  $\text{Asn}(3)\text{H}_\alpha$  and  $\text{Asp}(1)\text{H}_\alpha$ ), 4.52 (q,  $J = 6.8$  Hz, 1H,  $\text{Asn}(6)\text{H}_\alpha$ ), 4.41 (dd,  $J = 8.6, 5.5$  Hz, 1H,  $\text{Pro}(2)\text{H}_\alpha$ ), 4.37 (d,  $J = 5.4$  Hz, 1H,  $\text{Pro}(5)\text{H}_\alpha$ ), 4.22 (s, 1H,  $\text{D-Phe}(4)\text{H}_\alpha$ ), 3.78 (s, 1H,  $\text{Pro}(2)\text{H}_{\delta_2}$ ), 3.63 (s, 1H,  $\text{Pro}(2)\text{H}_{\delta_1}$ ), 3.53 (s, 3H,  $\text{Asn}(6)\text{-OCH}_3$ ), 3.30 (s, 1H,  $\text{Pro}(5)\text{H}_{\delta_2}$ ), 3.17-3.07 (m, 2H,  $\text{D-Phe}(4)\text{H}_{\beta_1}$  and  $\text{D-Phe}(4)\text{H}_{\beta_2}$ ), 2.94-2.84 (m, 3H,  $\text{Asp}(1)\text{H}_{\beta_2}$ ,  $\text{Asn}(3)\text{H}_{\beta_2}$ , and  $\text{Asn}(6)\text{H}_{\beta_2}$ ), 2.68 (m, 2H,  $\text{Asp}(1)\text{H}_{\beta_1}$  and  $\text{Asn}(6)\text{H}_{\beta_1}$ ), 2.56 (m, 1H,  $\text{Asn}(3)\text{H}_{\beta_1}$ ), 2.36-2.11 (m, 2H,  $\text{Pro}(2)\text{H}_{\beta_2}$  and  $\text{Pro}(2)\text{H}_{\delta_1}$ ), 2.00-1.76 (m, 4H,  $\text{Pro}(5)\text{H}_{\beta_2}$ ,  $\text{Pro}(2)\text{H}_{\beta_1}$ ,  $\text{Pro}(2)\text{H}_{\gamma_1}$ , and  $\text{Pro}(2)\text{H}_{\gamma_2}$ ), 1.72-1.56 (m, 2H,  $\text{Pro}(5)\text{H}_{\gamma_2}$  and  $\text{Pro}(5)\text{H}_{\beta_1}$ ), 1.39-1.36 (s, 10H,  $\text{Asp}(1)\text{-Boc}$  and  $\text{Pro}(5)\text{H}_{\gamma_1}$ ).

## 8. NMR Structure Elucidation

**8.1 Modeling of peptide 6:** A distance,  $r_{ij}$ , between protons whose through-space interactions manifested in a ROESY crosspeak were calculated using the equation<sup>11</sup>:

$$r_{ij} = r_{ref} \sqrt[6]{\left( \frac{v_{ref} c_{ref}}{v_{ij} c_{ij}} \right)}$$

The value of  $c_{ij}$  is defined as:

$$c_{ij} = \frac{1}{\sin^2 q_i \times \sin^2 q_j}$$

The constant  $c_{ref}$  is the average of all  $c_{ij}$  values across all peaks. This correction was applied to offset the inherent decrease in peak intensity relative to a peak's distance from the spectral center.

The value of  $q$  is defined as:

<sup>11</sup> a) Ammalahti, E.; Bardet, M.; Molko, D.; Cadet, J. *J. Magn. Res. A.* **1996**, *122*, 230-232. b) NMR Experiments on the Bruker 400 and 500 <http://www.columbia.edu/cu/chemistry/groups/nmr/noe-99.html> (accessed 15 June 2014).

$$q_i = \tan^{-1} \left( \frac{gB_1}{\omega_i - \omega_0} \right)$$

The value of  $gB_1$  spin lock power of the instrument and the  $(\omega_i - \omega_0)$  is the difference between the peak in question and the transmitter center.

The reference volume,  $v_{ref}$ , was set to the volume of the crosspeaks showing a correlation between the two  $\delta$  protons on proline 5. These crosspeaks were chosen as reference because they were completely free of obstruction from other protons and a reference distance,  $r_{ref}$ , of 1.8 Å—a known distance between proline  $\delta$  protons, extracted from crystal structures—could be assigned to  $v_{ref}$ .

Distances were calculated from the integrations of crosspeaks between protons,  $v_{ij}$ . These distances were averaged from crosspeaks on both sides of the diagonal to give distance estimations that were then assigned to appropriate bins for use in the *Crystallography & NMR Systems* (CNS) modeling.<sup>12</sup> These estimated distances are tabulated in the table below.

**Table SI4: Peptide 6 Proton Distances**

| Proton i   | Proton j   | Average Distance (Å) |
|------------|------------|----------------------|
| Asp(1)-HB1 | Pro(2)-HD2 | 2.7                  |
| Asp(1)-HA  | Pro(2)-HD1 | 2.3                  |
| Asp(1)-HA  | Pro(2)-HD2 | 2.2                  |
| Pro(2)-HA  | Asn(3)-HN  | 3.1                  |
| Pro(2)-HD1 | Asn(3)-HN  | 3.1                  |
| Asn(3)-HN  | Dphe(4)-HN | 2.5                  |
| Dphe(4)-HA | Pro(5)-HD1 | 2.2                  |
| Dphe(4)-HA | Pro(5)-HD2 | 2.2                  |
| Pro(5)-HD2 | Asn(6)-HN  | 3.2                  |
| Pro(5)-HA  | Asn(6)-HN  | 2.8                  |
| Dphe(4)-HA | Asn(6)-NH  | 3.5                  |
| Asn(3)-HA  | Dphe(4)-NH | 3.0                  |
| Pro(2)-HA  | Dphe(4)-HN | 3.5                  |

These distances were grouped according to predetermined distance ranges. The peptide's methyl ester; trityl and Boc groups; and dPhe were constructed manually using the distances and angles from known crystal structures in combination with the amino acid topology/parameter files provided by CNS. Various bins were used to derive 1000 structures through simulated annealing of extended peptide **6**. The ten lowest energy conformations were chosen and analyzed further.

<sup>12</sup> (a) Brünger, A.T.; Adams, P.D.; Clore, G.M.; Gros, P.; Kunstleve-Grosse, R.W.; Kuszewski, J.; Nilges, N.; Pannu, N.S.; Read, R.J.; Rice, L.M.; Simonson, T.; Warren, G.L. *Acta Cryst.* **1998**, *54*, 905-921. (b) Brünger, A.T. *Nature Protocols* **2007**, *2*, 2728-2733.

Different binning systems were examined that grouped strong to weak peaks differently. The final binning system chosen (1, as listed below) was done so because, by visual inspection, it produced an ensemble of ten low energy conformations that seemed to have the most internal consistency. Additionally, the bins analyzed in the text of the manuscript (bins 1) are based upon bins with precedence utility in calculations involving proteins and peptides.

## 8.2 Calculated NMR structures of Peptide 6 and the respective binning procedures

1. Bins are as follows: very strong = 1.8-2.5 Å; strong = 1.8-3.0 Å; medium = 1.8-3.5 Å; weak = 1.8-4.5 Å.<sup>13</sup>

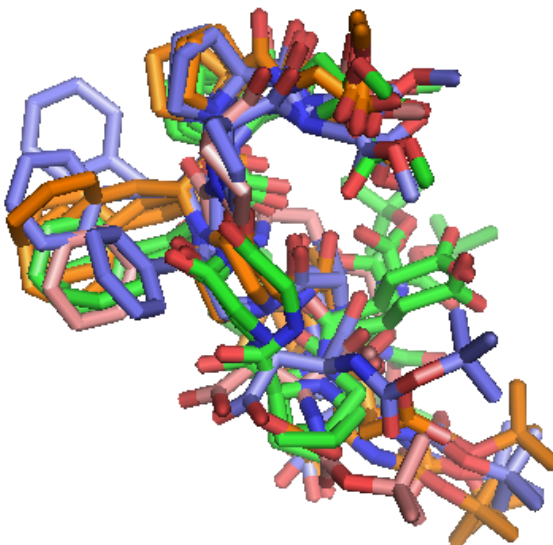

---

<sup>13</sup> Slightly modified bins from Ref 14.

2. Bins are as follows: strong = 1.8-2.7 Å; medium = 1.8-3.3 Å; weak = 1.8-5.0 Å.<sup>14</sup>

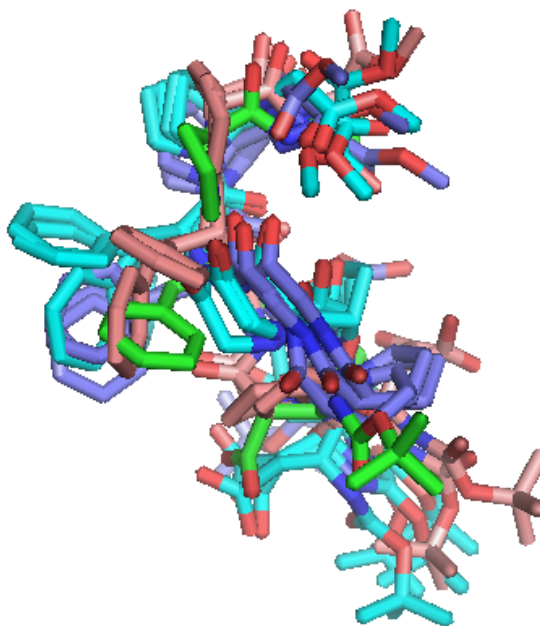

3. Bins are as follows: strong = 1.8-2.5 Å; medium = 1.8-3.0 Å; weak = 1.8-4.0 Å; non-sequential involving  $\alpha$ -H and NH: 1.8-4.0 Å; non-sequential involving side chains: 1.8-5.0 Å.<sup>15</sup>

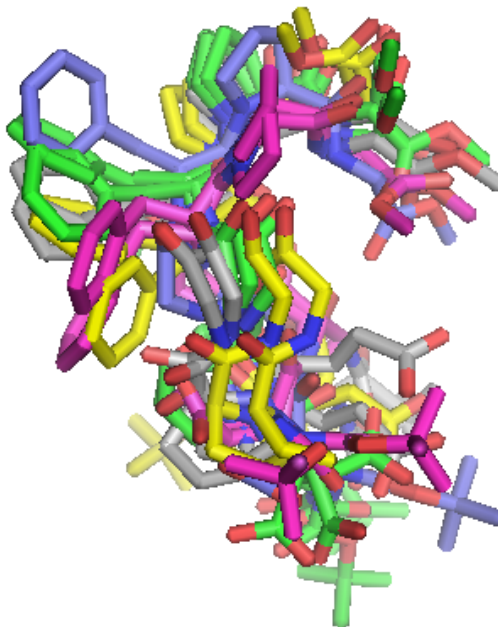

<sup>14</sup> Cavanagh, J.; Fairbrother, W.J.; Palmer, A.G.; Rance, M; Skelton, N.G. Protein NMR Spectroscopy: Principles and Practice, 3<sup>rd</sup> Ed. Elsevier Academic Press: Boston, 2007.

<sup>15</sup> Wuthrich, K. NMR of Proteins and Nucleic Acids. Wiley-Interscience Publication: New York, 1986.



4. Bins are as follows: (Calculated distance between protons  $\times 1.2$ ) Å

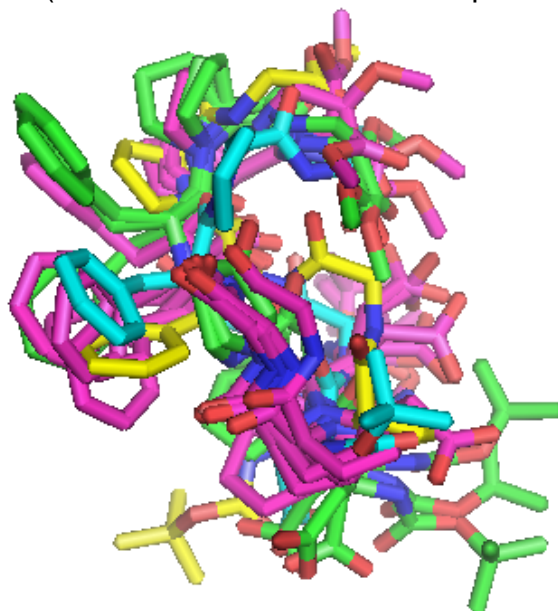

5. Bins are as follows: 1.8-5.0 Å.<sup>16</sup>

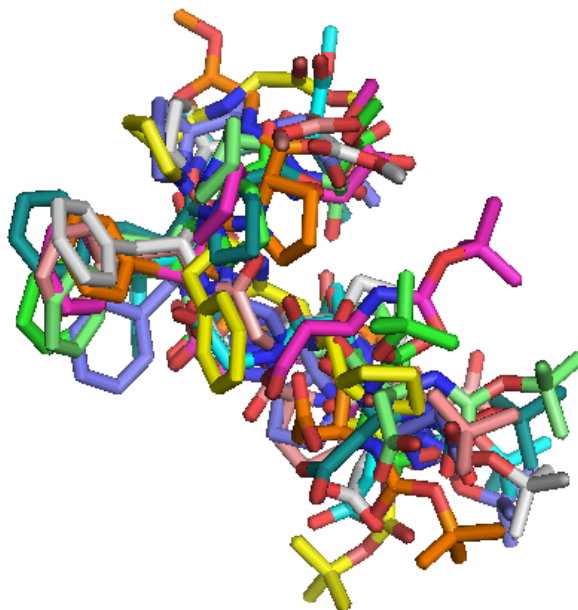

---

<sup>16</sup> Guntert, P. *Methods Mol. Biol.* **2004**, 278, 352-378.

**Table SI5: NMR Statistics for Peptide 6 using Bin 1**

|                                                              |                   |
|--------------------------------------------------------------|-------------------|
| <b>NMR constraints</b>                                       | 13                |
| <b>Distance constraints</b>                                  |                   |
| Total ROE                                                    | 13                |
| Intra-residue                                                | 0                 |
| Inter-residue                                                | 13                |
| Sequential ( $ i - j  = 1$ )                                 | 11                |
| Medium-range ( $ i - j  < 4$ )                               | 2                 |
| Long-range ( $ i - j  > 5$ )                                 | 0                 |
| Intermolecular                                               | 0                 |
| Hydrogen bonds                                               | 0                 |
| <b>Total dihedral angle restraints</b>                       |                   |
| $\phi$                                                       | 0                 |
| $\psi$                                                       | 0                 |
| <b>Structure statistics</b>                                  |                   |
| Violations (mean and s.d.)                                   | $7 \pm 2^*$       |
| Distance constraints (Å)                                     | $0.005 \pm 0.004$ |
| Max. distance constraint violation (Å)                       | 0                 |
| <b>Deviations from idealized geometry</b>                    |                   |
| Bond lengths (Å)                                             | $\pm 0.0021$      |
| Bond angles ( $^\circ$ )                                     | $\pm 0.535$       |
| Impropers ( $^\circ$ )                                       | $\pm 0.308$       |
| <b>Average pairwise r.m.s. deviation (Å) (10 Structures)</b> |                   |
| Side Chain                                                   | $1.4 \pm 0.5$     |
| Backbone                                                     | $7 \pm 2$         |

\*This comes from a conflict between non-idealized geometry within our manually built monomers and CNS. This does not reflect a conflict within our data.

## 9. Tabulated RMSD (Å) values for pairwise fitting of different backbone regions of peptide 6.

Because the C-terminal region of peptide 6 seemed to adopt a  $\gamma$ -turn conformation across all structures, we wondered if there were other regions of uniformity in the peptide sequence. The following RMSD values for the described regions were obtained using the pair-fitting algorithm in Pymol.<sup>17</sup> Each atom was selected from an ensemble structure and then all selections were collectively fit to their corresponding atoms (peptides are treated as rigid bodies) in a reference structure. Because no one structure was more or less likely than any other, we selected the average structure of the NMR ensemble as this reference, so that our measurements would then be reflective of uniformity or heterogeneity of conformation within the ensemble as a whole.

**Region 1:** Atoms N, C, CA, and O of residues Asp(1) and Pro(2). These residues are referred to in the text as  $i$  and  $i+1$ , respectively. The atom names come from the PDB

<sup>17</sup> The Pymol Molecular Graphics System, Version 1.5.0.4, Schrodinger, LLC.

file nomenclature. Below is the structure with atoms highlighted in red and image of the overlay of the ensemble structures.

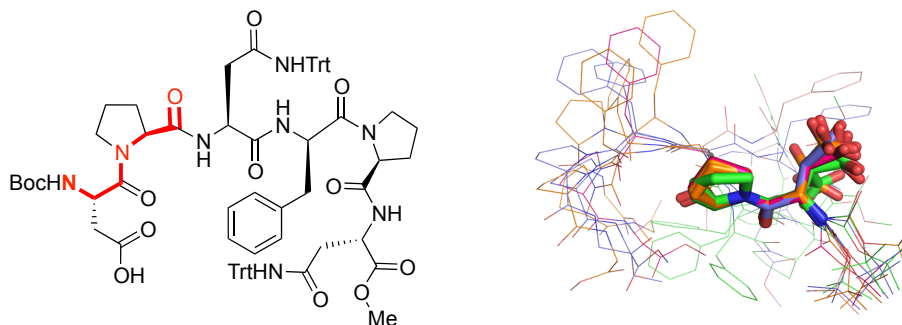

**Table S6.** RMSD values (Å) for pairwise fitting of Region 1 of peptide **6**.

| Structure   | RMSD (Å)           |
|-------------|--------------------|
| 1           | 0.195              |
| 2           | 0.046              |
| 3           | 0.084              |
| 4           | 0.151              |
| 5           | 0.134              |
| 6           | 0.040              |
| 7           | 0.070              |
| 8           | 0.038              |
| 9           | 0.136              |
| 10          | 0.070              |
| <b>Avg.</b> | <b>0.10 ± 0.05</b> |

**Note:** We do not deem measurements to the one-thousandth of an angstrom significant. The extra significant digit was carried for rounding purposes and is not reflected in the average value.

**Region 2:** Atoms N, C, CA, and O of residues D-Phe (4), Pro(5), and AsnTrt(6), excluding the atoms from the C-terminal ester of residue 6. These residues are referred to in the text as *i+3*, *i+4*, and *i+5*, respectively. The atom names come from the PDB file nomenclature. Below is the structure with atoms highlighted in red an image of the overlay of the ensemble structures.

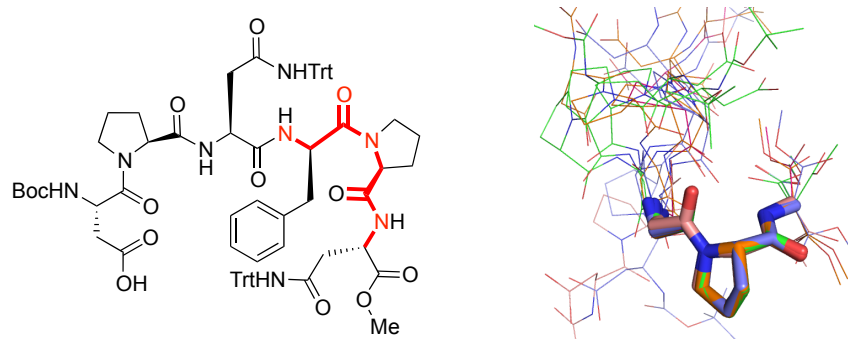

**Table S7.** RMSD values (Å) for pairwise fitting of Region 2 of peptide 6.

| Structure   | RMSD (Å)           |
|-------------|--------------------|
| 1           | 0.157              |
| 2           | 0.104              |
| 3           | 0.153              |
| 4           | 0.103              |
| 5           | 0.165              |
| 6           | 0.012              |
| 7           | 0.073              |
| 8           | 0.127              |
| 9           | 0.022              |
| 10          | 0.170              |
| <b>Avg.</b> | <b>0.11 ± 0.06</b> |

**Region 3:** Atoms N, C, CA, and O of residue AsnTrt(3) (*i*+2 in the manuscript), including the C and O atoms from the preceding residue and the N atom the trailing residue. The inclusion of these atoms is necessary to evaluate the conformation of this residue, as they (other than the carbonyl oxygen) are required for the calculation of any residue's  $\phi/\psi$  backbone dihedral angles. The atom names come from the PDB file nomenclature. Below is the structure with atoms highlighted in red an image of the overlay of the ensemble structures.

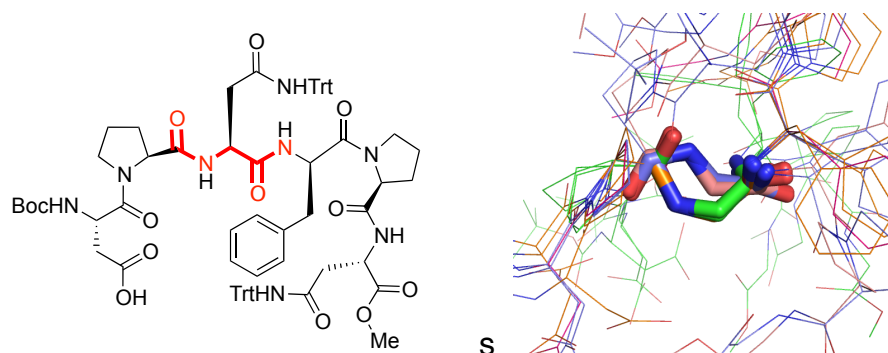

**Table S8.** RMSD values (Å) for pairwise fitting of Region 3 of peptide 6.

| Structure   | RMSD (Å)         |
|-------------|------------------|
| 1           | 1.235            |
| 2           | 1.232            |
| 3           | 0.053            |
| 4           | 1.201            |
| 5           | 1.208            |
| 6           | 0.025            |
| 7           | 1.250            |
| 8           | 0.010            |
| 9           | 0.090            |
| 10          | 0.034            |
| <b>Avg.</b> | <b>0.6 ± 0.6</b> |

## 9. Crystallographic Data

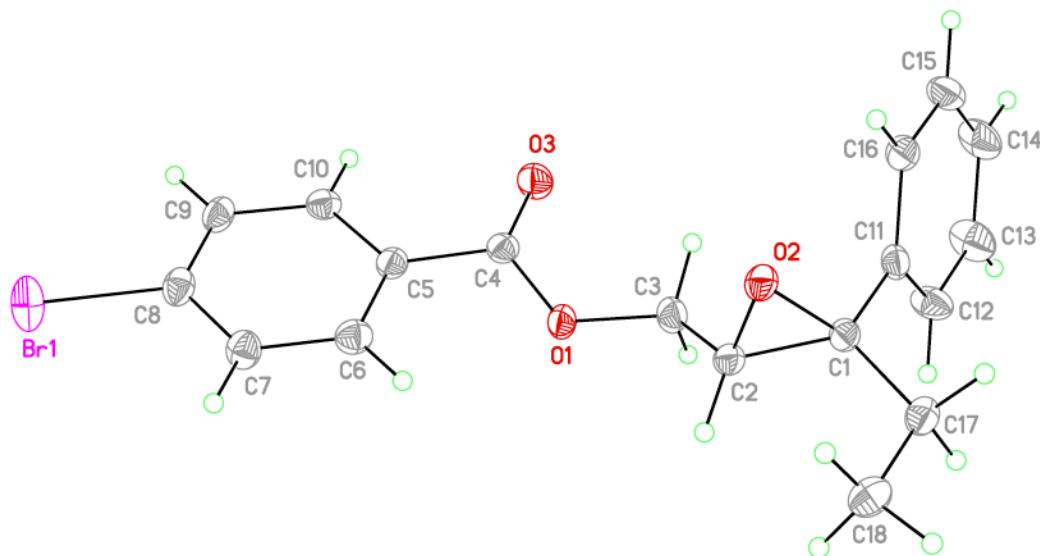

**Table SI6. Crystal data and structure refinement for ((2*S*,3*R*)-3-Ethyl-3-phenyloxiran-2-yl)methyl 4-bromobenzoate.**

|                                 |                                                   |                  |
|---------------------------------|---------------------------------------------------|------------------|
| Identification code             | cm18cas                                           |                  |
| Empirical formula               | C <sub>18</sub> H <sub>17</sub> Br O <sub>3</sub> |                  |
| Formula weight                  | 361.23                                            |                  |
| Temperature                     | 180(2) K                                          |                  |
| Wavelength                      | 0.71073 Å                                         |                  |
| Crystal system                  | Monoclinic                                        |                  |
| Space group                     | P2(1)                                             |                  |
| Unit cell dimensions            | a = 8.4484(19) Å                                  | a = 90°.         |
|                                 | b = 6.0156(13) Å                                  | b = 104.755(3)°. |
|                                 | c = 16.494(4) Å                                   | g = 90°.         |
| Volume                          | 810.6(3) Å <sup>3</sup>                           |                  |
| Z                               | 2                                                 |                  |
| Density (calculated)            | 1.480 Mg/m <sup>3</sup>                           |                  |
| Absorption coefficient          | 2.545 mm <sup>-1</sup>                            |                  |
| F(000)                          | 368                                               |                  |
| Crystal size                    | 0.334 x 0.237 x 0.098 mm <sup>3</sup>             |                  |
| Theta range for data collection | 2.49 to 25.37°.                                   |                  |
| Index ranges                    | -10 ≤ h ≤ 10, -7 ≤ k ≤ 7, -19 ≤ l ≤ 19            |                  |
| Reflections collected           | 11991                                             |                  |

|                                   |                                             |
|-----------------------------------|---------------------------------------------|
| Independent reflections           | 2923 [R(int) = 0.0386]                      |
| Completeness to theta = 25.37°    | 99.9 %                                      |
| Absorption correction             | Integration                                 |
| Max. and min. transmission        | 0.8350 and 0.5003                           |
| Refinement method                 | Full-matrix least-squares on F <sup>2</sup> |
| Data / restraints / parameters    | 2923 / 1 / 200                              |
| Goodness-of-fit on F <sup>2</sup> | 1.022                                       |
| Final R indices [I>2sigma(I)]     | R1 = 0.0250, wR2 = 0.0583                   |
| R indices (all data)              | R1 = 0.0281, wR2 = 0.0599                   |
| Absolute structure parameter      | -0.008(7)                                   |
| Largest diff. peak and hole       | 0.318 and -0.395 e.Å <sup>-3</sup>          |

**Table SI7. Atomic coordinates (  $\times 10^4$ ) and equivalent isotropic displacement parameters ( $\text{\AA}^2 \times 10^3$ ) for cm18cas.**

U(eq) is defined as one third of the trace of the orthogonalized  $U_{ij}$  tensor.

|       | x        | y        | z       | U(eq) |
|-------|----------|----------|---------|-------|
| Br(1) | -3430(1) | 9652(1)  | 5393(1) | 47(1) |
| O(1)  | 3278(2)  | 3278(3)  | 6995(1) | 31(1) |
| O(2)  | 4882(2)  | 1423(3)  | 8830(1) | 28(1) |
| O(3)  | 4608(2)  | 6375(3)  | 6775(1) | 36(1) |
| C(1)  | 5912(2)  | -337(5)  | 8636(1) | 24(1) |
| C(2)  | 4539(3)  | 572(4)   | 7980(1) | 25(1) |
| C(3)  | 4816(3)  | 2127(4)  | 7328(2) | 31(1) |
| C(4)  | 3351(3)  | 5395(4)  | 6748(1) | 26(1) |
| C(5)  | 1689(3)  | 6369(4)  | 6439(1) | 26(1) |
| C(6)  | 281(3)   | 5301(4)  | 6532(2) | 32(1) |
| C(7)  | -1251(3) | 6276(5)  | 6227(2) | 32(1) |
| C(8)  | -1347(3) | 8307(4)  | 5832(1) | 31(1) |
| C(9)  | 29(3)    | 9422(5)  | 5731(1) | 31(1) |
| C(10) | 1551(3)  | 8426(4)  | 6038(1) | 28(1) |
| C(11) | 7616(3)  | 386(4)   | 8644(1) | 26(1) |
| C(12) | 8467(3)  | -729(5)  | 8148(2) | 38(1) |
| C(13) | 10033(3) | -48(7)   | 8141(2) | 49(1) |
| C(14) | 10759(3) | 1727(6)  | 8624(2) | 46(1) |
| C(15) | 9923(3)  | 2842(5)  | 9114(2) | 39(1) |
| C(16) | 8355(3)  | 2185(4)  | 9128(2) | 30(1) |
| C(17) | 5770(3)  | -2564(4) | 9036(2) | 30(1) |
| C(18) | 4059(3)  | -3273(5) | 9052(2) | 36(1) |



**Table SI8. Bond lengths [Å] and angles [°] for cm18cas.**

---

|             |          |
|-------------|----------|
| Br(1)-C(8)  | 1.904(2) |
| O(1)-C(4)   | 1.343(3) |
| O(1)-C(3)   | 1.451(3) |
| O(2)-C(2)   | 1.451(3) |
| O(2)-C(1)   | 1.456(3) |
| O(3)-C(4)   | 1.206(3) |
| C(1)-C(2)   | 1.476(3) |
| C(1)-C(11)  | 1.501(3) |
| C(1)-C(17)  | 1.511(4) |
| C(2)-C(3)   | 1.487(3) |
| C(2)-H(2)   | 1.0000   |
| C(3)-H(3A)  | 0.9900   |
| C(3)-H(3B)  | 0.9900   |
| C(4)-C(5)   | 1.486(3) |
| C(5)-C(10)  | 1.394(4) |
| C(5)-C(6)   | 1.394(3) |
| C(6)-C(7)   | 1.393(3) |
| C(6)-H(6)   | 0.9500   |
| C(7)-C(8)   | 1.378(4) |
| C(7)-H(7)   | 0.9500   |
| C(8)-C(9)   | 1.388(4) |
| C(9)-C(10)  | 1.392(3) |
| C(9)-H(9)   | 0.9500   |
| C(10)-H(10) | 0.9500   |
| C(11)-C(12) | 1.390(3) |
| C(11)-C(16) | 1.395(3) |
| C(12)-C(13) | 1.388(4) |
| C(12)-H(12) | 0.9500   |
| C(13)-C(14) | 1.379(4) |
| C(13)-H(13) | 0.9500   |
| C(14)-C(15) | 1.376(4) |
| C(14)-H(14) | 0.9500   |
| C(15)-C(16) | 1.388(4) |
| C(15)-H(15) | 0.9500   |

|              |          |
|--------------|----------|
| C(16)-H(16)  | 0.9500   |
| C(17)-C(18)  | 1.514(4) |
| C(17)-H(17A) | 0.9900   |
| C(17)-H(17B) | 0.9900   |
| C(18)-H(18A) | 0.9800   |
| C(18)-H(18B) | 0.9800   |
| C(18)-H(18C) | 0.9800   |

|                  |            |
|------------------|------------|
| C(4)-O(1)-C(3)   | 117.5(2)   |
| C(2)-O(2)-C(1)   | 61.01(13)  |
| O(2)-C(1)-C(2)   | 59.33(14)  |
| O(2)-C(1)-C(11)  | 114.4(2)   |
| C(2)-C(1)-C(11)  | 118.1(2)   |
| O(2)-C(1)-C(17)  | 115.53(18) |
| C(2)-C(1)-C(17)  | 120.9(2)   |
| C(11)-C(1)-C(17) | 115.83(19) |
| O(2)-C(2)-C(1)   | 59.67(14)  |
| O(2)-C(2)-C(3)   | 116.5(2)   |
| C(1)-C(2)-C(3)   | 121.6(2)   |
| O(2)-C(2)-H(2)   | 115.7      |
| C(1)-C(2)-H(2)   | 115.7      |
| C(3)-C(2)-H(2)   | 115.7      |
| O(1)-C(3)-C(2)   | 106.45(18) |
| O(1)-C(3)-H(3A)  | 110.4      |
| C(2)-C(3)-H(3A)  | 110.4      |
| O(1)-C(3)-H(3B)  | 110.4      |
| C(2)-C(3)-H(3B)  | 110.4      |
| H(3A)-C(3)-H(3B) | 108.6      |
| O(3)-C(4)-O(1)   | 124.1(2)   |
| O(3)-C(4)-C(5)   | 124.5(2)   |
| O(1)-C(4)-C(5)   | 111.5(2)   |
| C(10)-C(5)-C(6)  | 119.4(2)   |
| C(10)-C(5)-C(4)  | 118.1(2)   |
| C(6)-C(5)-C(4)   | 122.6(2)   |
| C(7)-C(6)-C(5)   | 120.4(2)   |
| C(7)-C(6)-H(6)   | 119.8      |

|                    |            |
|--------------------|------------|
| C(5)-C(6)-H(6)     | 119.8      |
| C(8)-C(7)-C(6)     | 118.8(2)   |
| C(8)-C(7)-H(7)     | 120.6      |
| C(6)-C(7)-H(7)     | 120.6      |
| C(7)-C(8)-C(9)     | 122.3(2)   |
| C(7)-C(8)-Br(1)    | 119.61(19) |
| C(9)-C(8)-Br(1)    | 118.1(2)   |
| C(8)-C(9)-C(10)    | 118.2(3)   |
| C(8)-C(9)-H(9)     | 120.9      |
| C(10)-C(9)-H(9)    | 120.9      |
| C(9)-C(10)-C(5)    | 120.9(2)   |
| C(9)-C(10)-H(10)   | 119.6      |
| C(5)-C(10)-H(10)   | 119.6      |
| C(12)-C(11)-C(16)  | 119.2(2)   |
| C(12)-C(11)-C(1)   | 119.6(2)   |
| C(16)-C(11)-C(1)   | 121.2(2)   |
| C(13)-C(12)-C(11)  | 120.0(3)   |
| C(13)-C(12)-H(12)  | 120.0      |
| C(11)-C(12)-H(12)  | 120.0      |
| C(14)-C(13)-C(12)  | 120.6(3)   |
| C(14)-C(13)-H(13)  | 119.7      |
| C(12)-C(13)-H(13)  | 119.7      |
| C(15)-C(14)-C(13)  | 119.8(2)   |
| C(15)-C(14)-H(14)  | 120.1      |
| C(13)-C(14)-H(14)  | 120.1      |
| C(14)-C(15)-C(16)  | 120.4(3)   |
| C(14)-C(15)-H(15)  | 119.8      |
| C(16)-C(15)-H(15)  | 119.8      |
| C(15)-C(16)-C(11)  | 120.1(2)   |
| C(15)-C(16)-H(16)  | 120.0      |
| C(11)-C(16)-H(16)  | 120.0      |
| C(1)-C(17)-C(18)   | 116.1(2)   |
| C(1)-C(17)-H(17A)  | 108.3      |
| C(18)-C(17)-H(17A) | 108.3      |
| C(1)-C(17)-H(17B)  | 108.3      |
| C(18)-C(17)-H(17B) | 108.3      |

|                     |       |
|---------------------|-------|
| H(17A)-C(17)-H(17B) | 107.4 |
| C(17)-C(18)-H(18A)  | 109.5 |
| C(17)-C(18)-H(18B)  | 109.5 |
| H(18A)-C(18)-H(18B) | 109.5 |
| C(17)-C(18)-H(18C)  | 109.5 |
| H(18A)-C(18)-H(18C) | 109.5 |
| H(18B)-C(18)-H(18C) | 109.5 |

---

Symmetry transformations used to generate equivalent atoms:

**Table SI9. Anisotropic displacement parameters ( $\text{\AA}^2 \times 10^3$ ) for cm18cas.**

The anisotropic displacement factor exponent takes the form:  $-2\pi^2 [h^2 a^{*2} U^{11} + \dots + 2 h k a^* b^* U^{12}]$

|       | U <sup>11</sup> | U <sup>22</sup> | U <sup>33</sup> | U <sup>23</sup> | U <sup>13</sup> | U <sup>12</sup> |
|-------|-----------------|-----------------|-----------------|-----------------|-----------------|-----------------|
| Br(1) | 34(1)           | 60(1)           | 48(1)           | 17(1)           | 13(1)           | 17(1)           |
| O(1)  | 24(1)           | 24(1)           | 42(1)           | 9(1)            | 2(1)            | 1(1)            |
| O(2)  | 24(1)           | 26(1)           | 36(1)           | -2(1)           | 9(1)            | 5(1)            |
| O(3)  | 29(1)           | 34(1)           | 45(1)           | 6(1)            | 7(1)            | -6(1)           |
| C(1)  | 23(1)           | 24(1)           | 26(1)           | -3(1)           | 6(1)            | 4(1)            |
| C(2)  | 22(1)           | 23(1)           | 31(1)           | -1(1)           | 6(1)            | 1(1)            |
| C(3)  | 22(1)           | 32(2)           | 37(1)           | 4(1)            | 6(1)            | 2(1)            |
| C(4)  | 30(1)           | 25(2)           | 21(1)           | -2(1)           | 4(1)            | -1(1)           |
| C(5)  | 29(1)           | 24(1)           | 23(1)           | -1(1)           | 5(1)            | 2(1)            |
| C(6)  | 34(1)           | 28(2)           | 32(1)           | 2(1)            | 9(1)            | -3(1)           |
| C(7)  | 29(1)           | 34(2)           | 35(1)           | 2(1)            | 12(1)           | 2(1)            |
| C(8)  | 34(1)           | 32(2)           | 26(1)           | -1(1)           | 7(1)            | 9(1)            |
| C(9)  | 38(1)           | 25(1)           | 28(1)           | 5(1)            | 6(1)            | 6(1)            |
| C(10) | 32(1)           | 26(1)           | 27(1)           | 0(1)            | 6(1)            | -4(1)           |
| C(11) | 22(1)           | 29(2)           | 26(1)           | 1(1)            | 3(1)            | 5(1)            |
| C(12) | 28(1)           | 43(2)           | 44(1)           | -20(1)          | 10(1)           | -2(1)           |
| C(13) | 28(1)           | 65(2)           | 56(2)           | -21(2)          | 16(1)           | 1(2)            |
| C(14) | 20(1)           | 61(2)           | 56(2)           | -11(2)          | 9(1)            | -5(1)           |
| C(15) | 28(1)           | 39(2)           | 44(2)           | -10(1)          | 1(1)            | -4(1)           |
| C(16) | 28(1)           | 30(1)           | 33(1)           | -4(1)           | 7(1)            | 5(1)            |
| C(17) | 33(1)           | 27(1)           | 31(1)           | 1(1)            | 8(1)            | 5(1)            |
| C(18) | 43(2)           | 29(2)           | 39(1)           | 4(1)            | 14(1)           | -2(1)           |

**Table SI10. Hydrogen coordinates (  $\times 10^4$ ) and isotropic displacement parameters ( $\text{\AA}^2 \times 10^3$ ) for cm18cas.**

|        | x     | y     | z    | U(eq) |
|--------|-------|-------|------|-------|
| H(2)   | 3555  | -407  | 7804 | 30    |
| H(3A)  | 5693  | 3200  | 7577 | 37    |
| H(3B)  | 5141  | 1296  | 6878 | 37    |
| H(6)   | 367   | 3899  | 6805 | 38    |
| H(7)   | -2212 | 5553  | 6291 | 38    |
| H(9)   | -65   | 10827 | 5460 | 37    |
| H(10)  | 2508  | 9158  | 5974 | 34    |
| H(12)  | 7977  | -1956 | 7815 | 46    |
| H(13)  | 10609 | -810  | 7800 | 59    |
| H(14)  | 11834 | 2178  | 8618 | 55    |
| H(15)  | 10421 | 4069  | 9445 | 46    |
| H(16)  | 7785  | 2961  | 9468 | 36    |
| H(17A) | 6456  | -2529 | 9620 | 36    |
| H(17B) | 6232  | -3713 | 8732 | 36    |
| H(18A) | 4119  | -4620 | 9393 | 55    |
| H(18B) | 3415  | -3576 | 8479 | 55    |
| H(18C) | 3536  | -2081 | 9296 | 55    |

**Table SI11. Torsion angles [°] for cm18cas.**

---

|                         |             |
|-------------------------|-------------|
| C(2)-O(2)-C(1)-C(11)    | 109.4(2)    |
| C(2)-O(2)-C(1)-C(17)    | -112.3(2)   |
| C(1)-O(2)-C(2)-C(3)     | -112.8(2)   |
| C(11)-C(1)-C(2)-O(2)    | -103.1(3)   |
| C(17)-C(1)-C(2)-O(2)    | 103.2(2)    |
| O(2)-C(1)-C(2)-C(3)     | 104.3(2)    |
| C(11)-C(1)-C(2)-C(3)    | 1.2(4)      |
| C(17)-C(1)-C(2)-C(3)    | -152.4(2)   |
| C(4)-O(1)-C(3)-C(2)     | 146.8(2)    |
| O(2)-C(2)-C(3)-O(1)     | -90.7(2)    |
| C(1)-C(2)-C(3)-O(1)     | -159.9(2)   |
| C(3)-O(1)-C(4)-O(3)     | 1.2(3)      |
| C(3)-O(1)-C(4)-C(5)     | -178.8(2)   |
| O(3)-C(4)-C(5)-C(10)    | 10.0(3)     |
| O(1)-C(4)-C(5)-C(10)    | -170.0(2)   |
| O(3)-C(4)-C(5)-C(6)     | -170.4(2)   |
| O(1)-C(4)-C(5)-C(6)     | 9.7(3)      |
| C(10)-C(5)-C(6)-C(7)    | 0.0(4)      |
| C(4)-C(5)-C(6)-C(7)     | -179.6(2)   |
| C(5)-C(6)-C(7)-C(8)     | 0.2(4)      |
| C(6)-C(7)-C(8)-C(9)     | -0.4(4)     |
| C(6)-C(7)-C(8)-Br(1)    | 178.95(18)  |
| C(7)-C(8)-C(9)-C(10)    | 0.5(4)      |
| Br(1)-C(8)-C(9)-C(10)   | -178.90(17) |
| C(8)-C(9)-C(10)-C(5)    | -0.3(4)     |
| C(6)-C(5)-C(10)-C(9)    | 0.0(4)      |
| C(4)-C(5)-C(10)-C(9)    | 179.7(2)    |
| O(2)-C(1)-C(11)-C(12)   | -152.5(2)   |
| C(2)-C(1)-C(11)-C(12)   | -85.7(3)    |
| C(17)-C(1)-C(11)-C(12)  | 69.3(3)     |
| O(2)-C(1)-C(11)-C(16)   | 26.4(3)     |
| C(2)-C(1)-C(11)-C(16)   | 93.2(3)     |
| C(17)-C(1)-C(11)-C(16)  | -111.8(3)   |
| C(16)-C(11)-C(12)-C(13) | 0.0(4)      |

|                         |           |
|-------------------------|-----------|
| C(1)-C(11)-C(12)-C(13)  | 178.9(3)  |
| C(11)-C(12)-C(13)-C(14) | 0.2(5)    |
| C(12)-C(13)-C(14)-C(15) | -0.4(5)   |
| C(13)-C(14)-C(15)-C(16) | 0.3(5)    |
| C(14)-C(15)-C(16)-C(11) | -0.1(4)   |
| C(12)-C(11)-C(16)-C(15) | -0.1(4)   |
| C(1)-C(11)-C(16)-C(15)  | -179.0(2) |
| O(2)-C(1)-C(17)-C(18)   | 40.6(3)   |
| C(2)-C(1)-C(17)-C(18)   | -27.5(3)  |
| C(11)-C(1)-C(17)-C(18)  | 178.3(2)  |

---

Symmetry transformations used to generate equivalent atoms.



**Spectral Data**  
**for**  
**Function-Oriented Investigations of a Peptide-Based Catalyst that Mediates**  
**Enantioselective Allylic Alcohol Epoxidation.**

Nadia C. Abascal, Phillip A. Lichtor, Michael W. Giuliano, Scott J. Miller\*

*Department of Chemistry, Yale University, P.O. Box 208107, New Haven, Connecticut  
06520-8107, United States.*

*HPLC Traces*

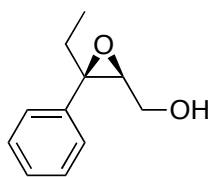

**((2*S*,3*R*)-3-Ethyl-3-phenyloxiran-2-yl)methanol (13)**

**Racemic**

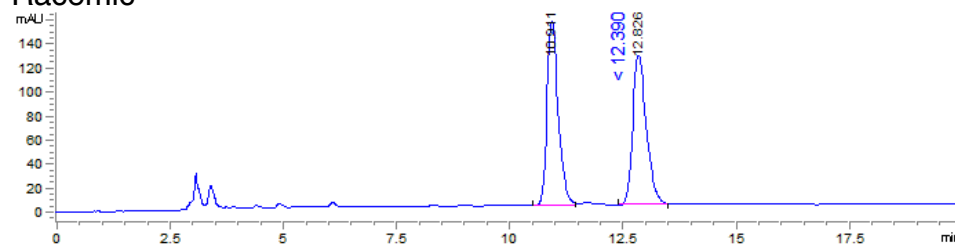

**Enantioenriched**

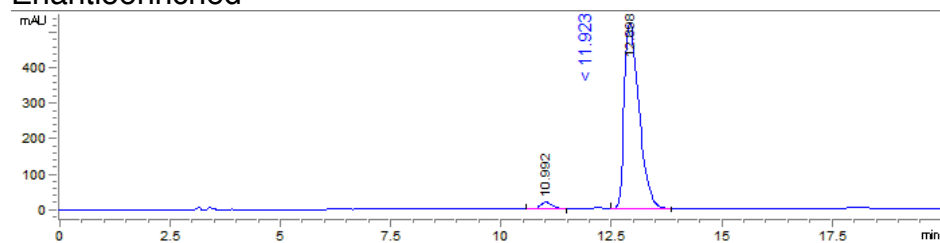

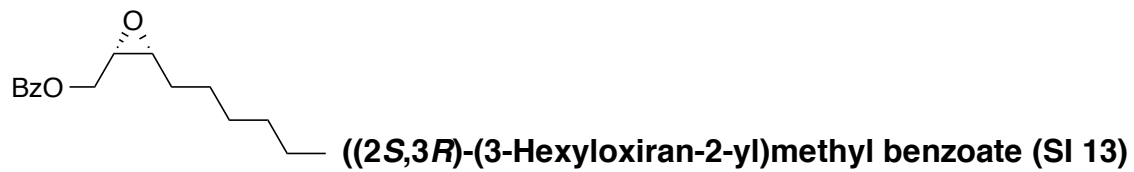

Racemic

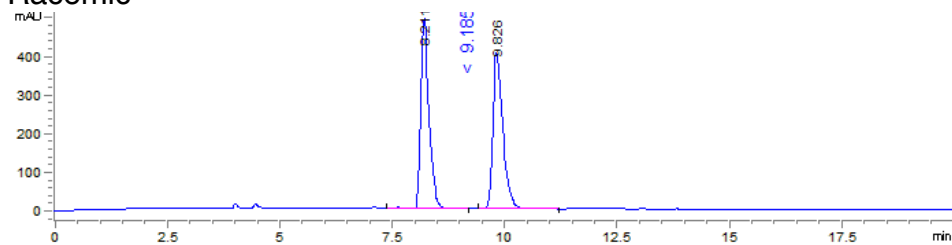

Enantioenriched

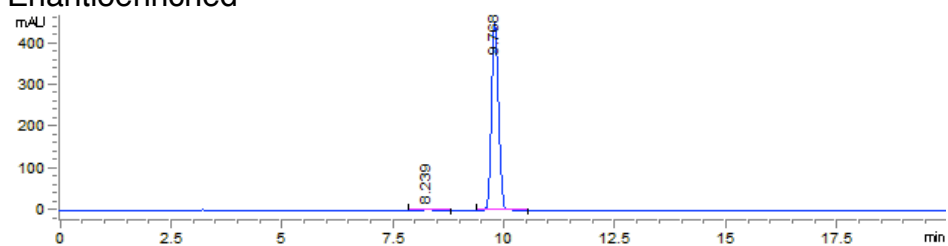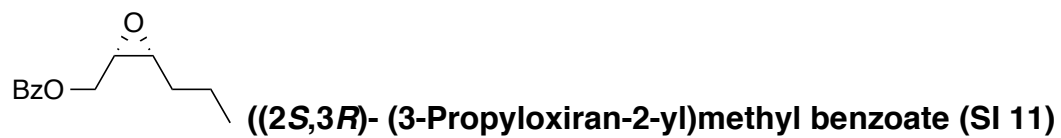

Racemic

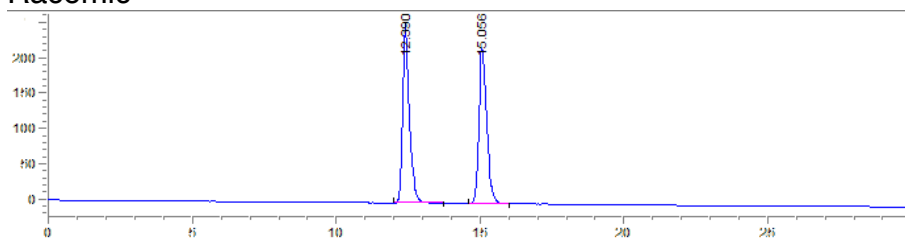

Enantioenriched

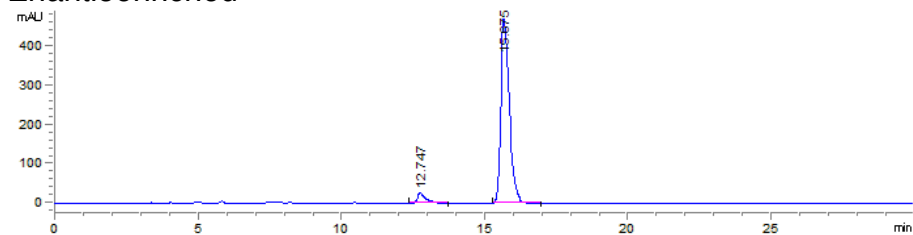

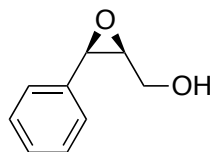

**((2*S*,3*R*)-3-Phenyloxiran-2-yl)methanol (16)**

**Racemic**

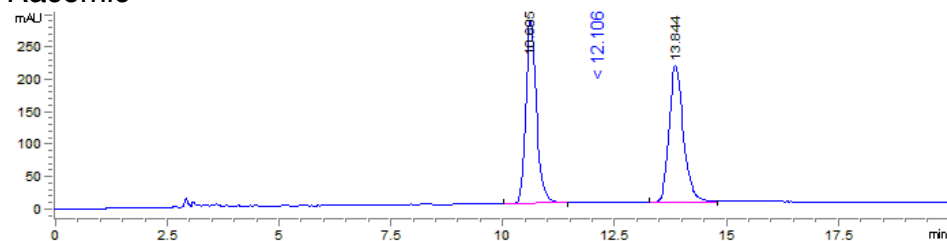

**Enantioenriched**

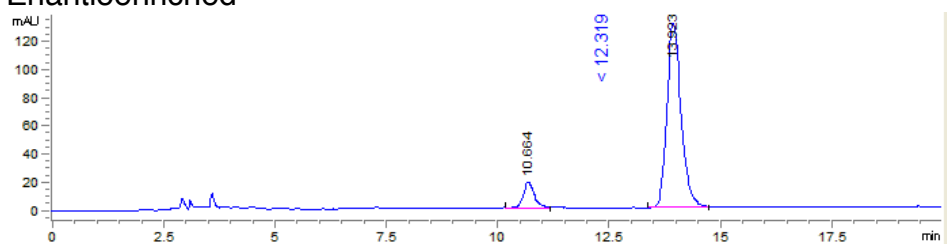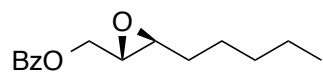

**((2*S*,3*S*)- (3-Pentyloxiran-2-yl)methyl benzoate (SI 10)**

**Racemic**

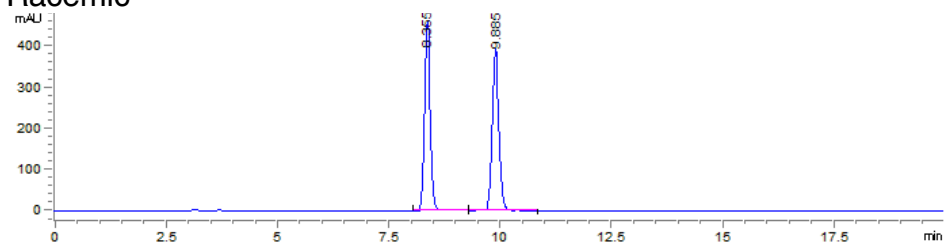

**Enantioenriched**

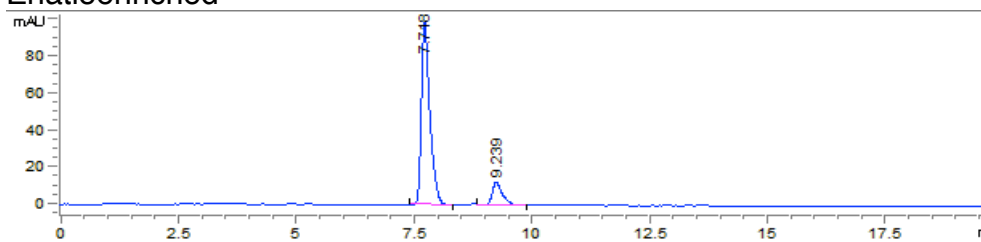

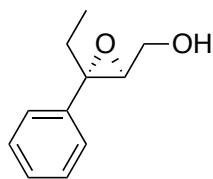

**((2*S*,3*S*)-3-Ethyl-3-phenyloxiran-2-yl)methanol (18)**

Racemic

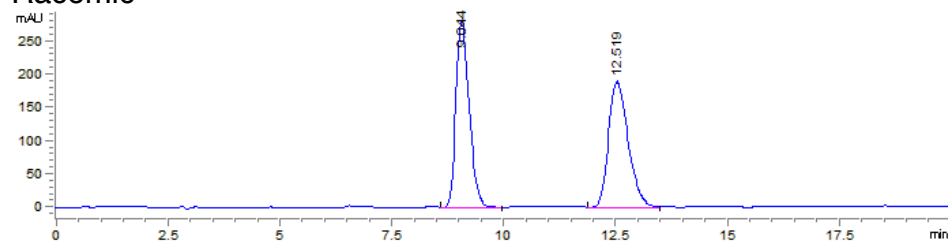

Enantioenriched

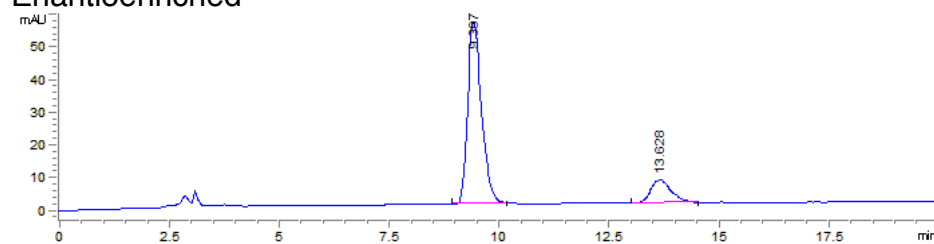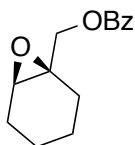

**((1*R*,6*R*)- (7-Oxabicyclo[4.1.0]heptan-1-yl)methyl benzoate (SI 12)**

Racemic

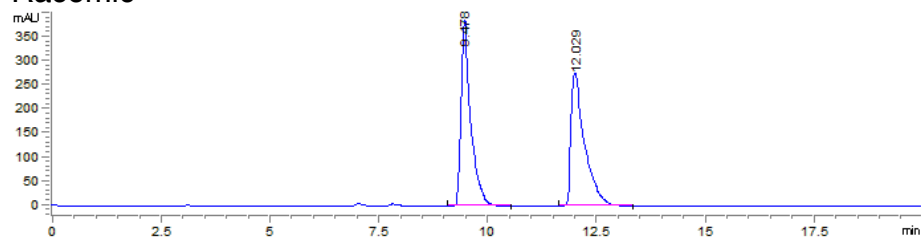

Enantioenriched

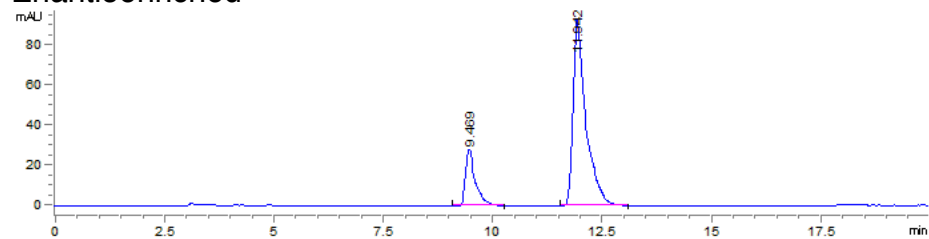

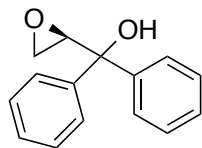

**(R)-Oxiran-2-ylidiphenylmethanol (20)**

Racemic

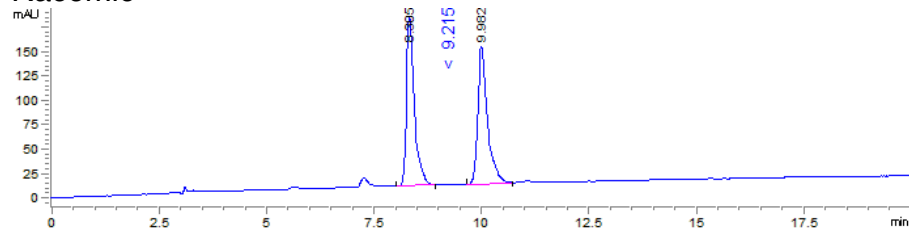

Enantioenriched

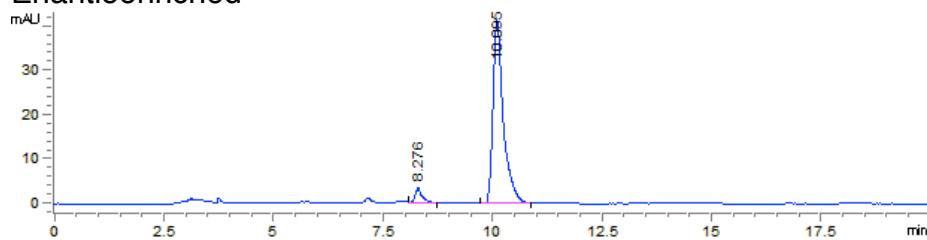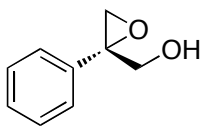

**(S)-(2-Phenyloxiran-2-yl)methanol (21)**

Racemic

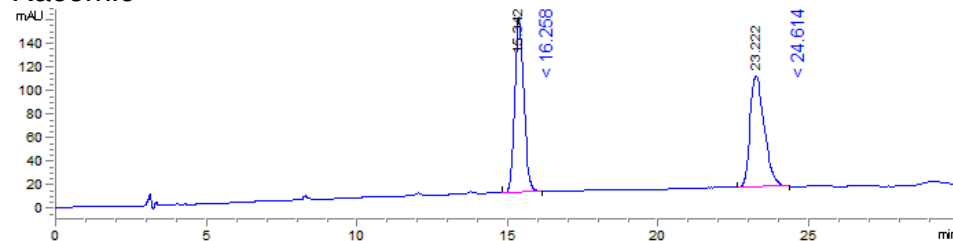

Enantioenriched

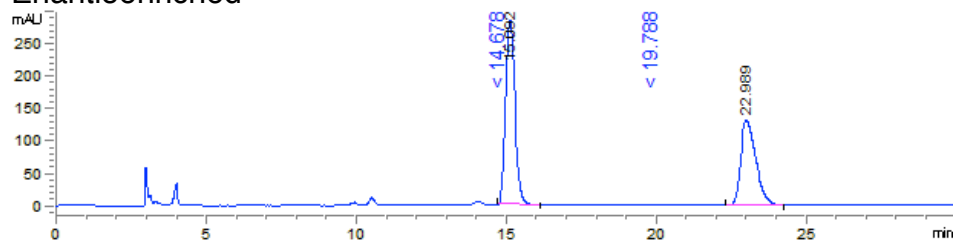

### Catalyst **6** NMR Data

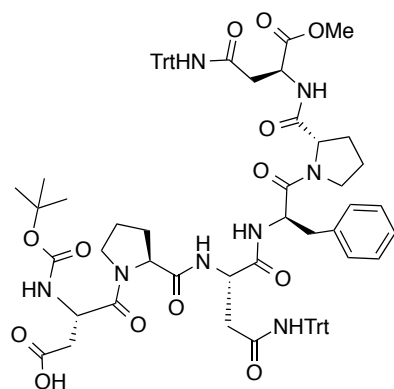1D  $^1\text{H}$  NMR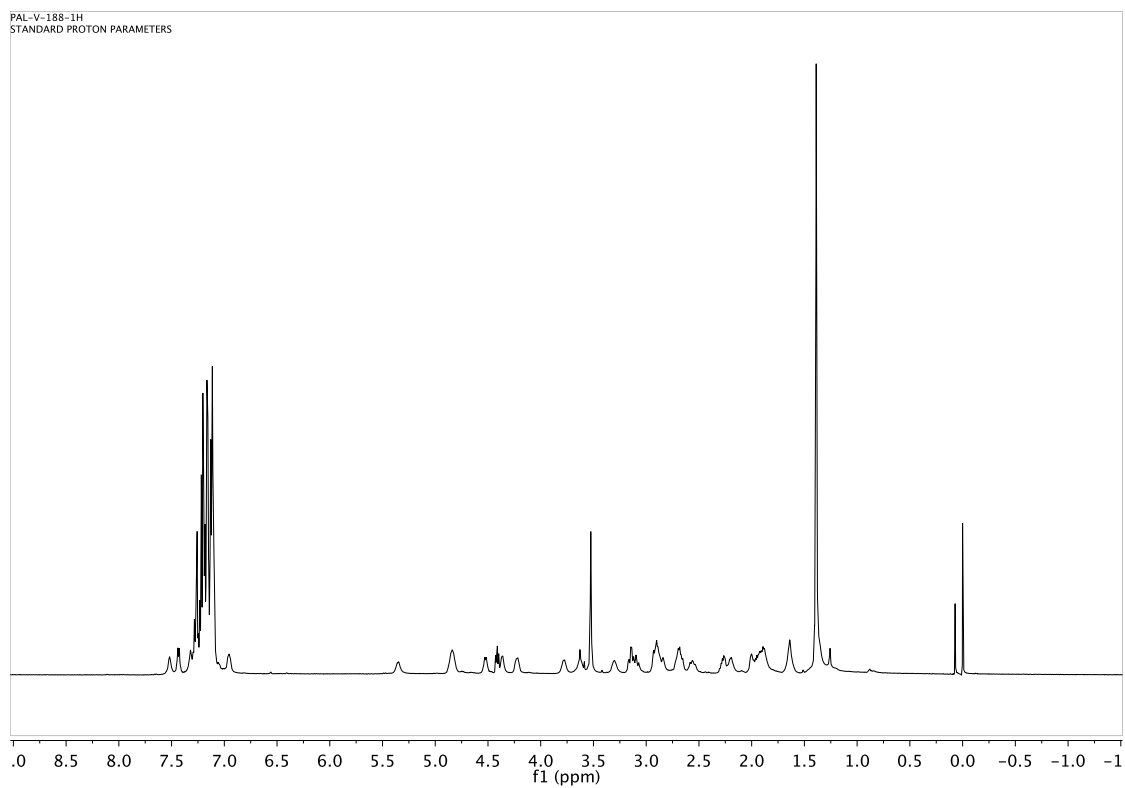

## 2D gCOSY NMR

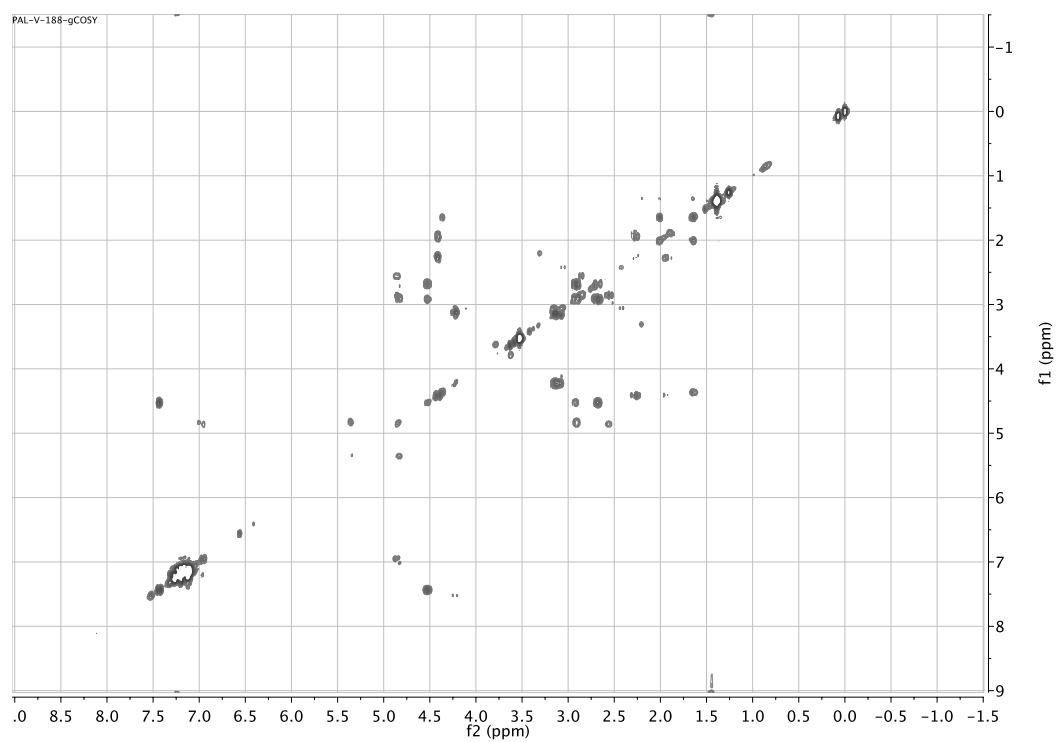

## 2D zTOCSY NMR

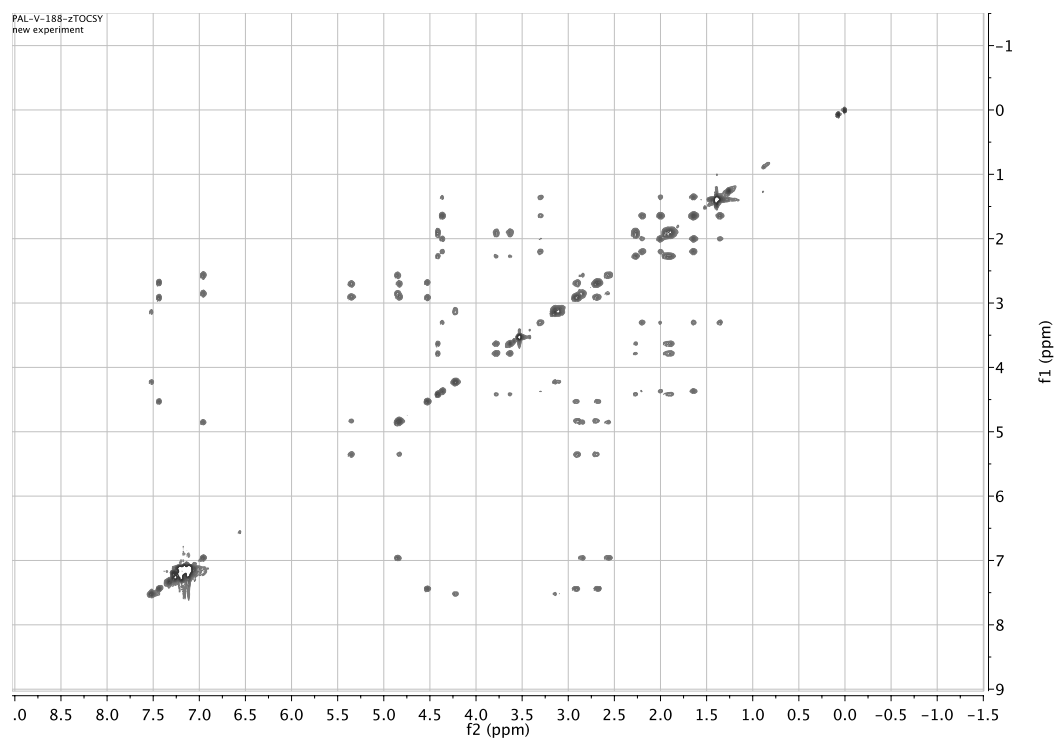

## 2D ROESY NMR

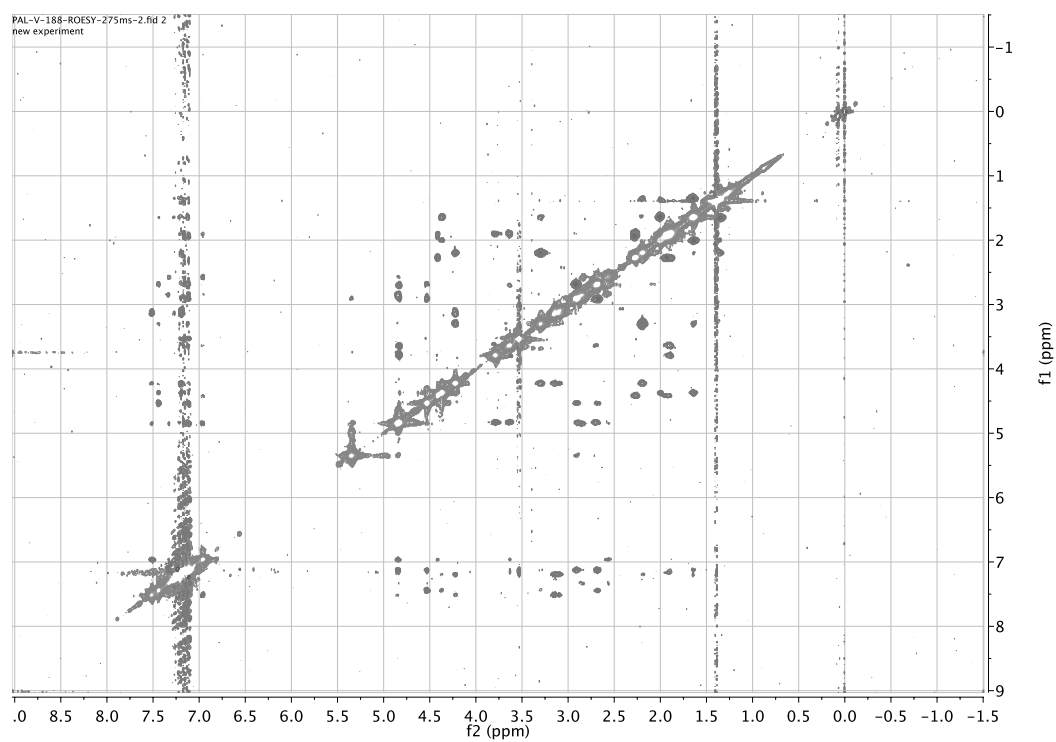

## Truncation Peptides NMR Data Catalyst **22** 1D $^1\text{H}$ NMR

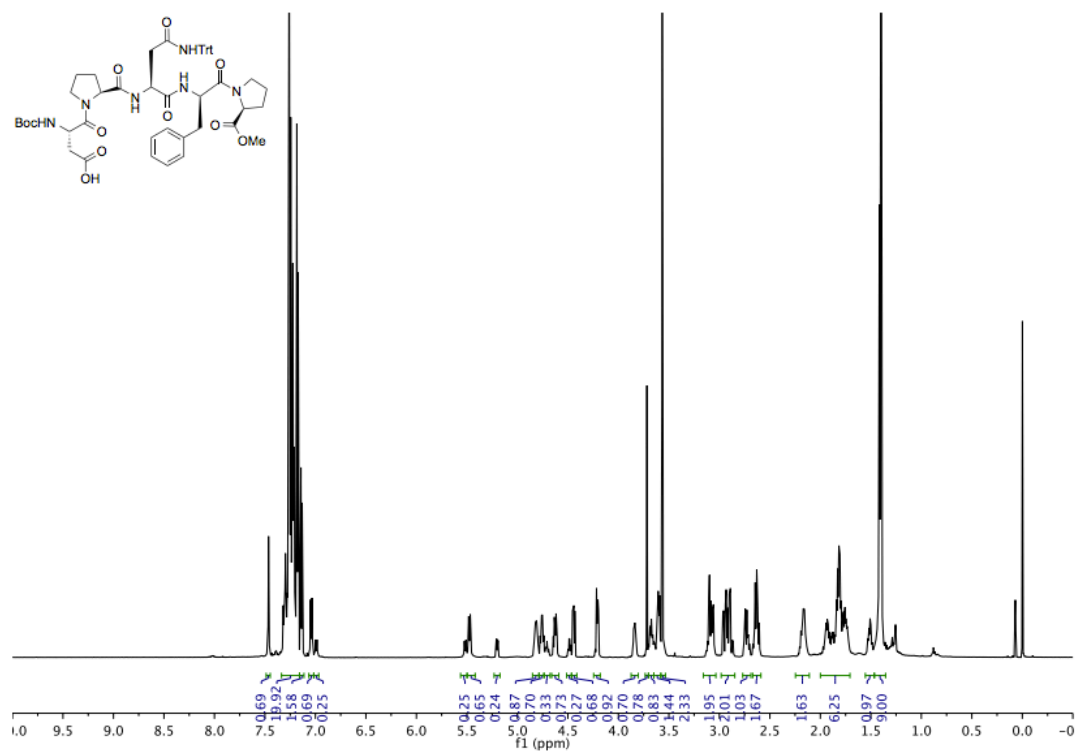



## Catalyst **22** 2D gCOSY NMR

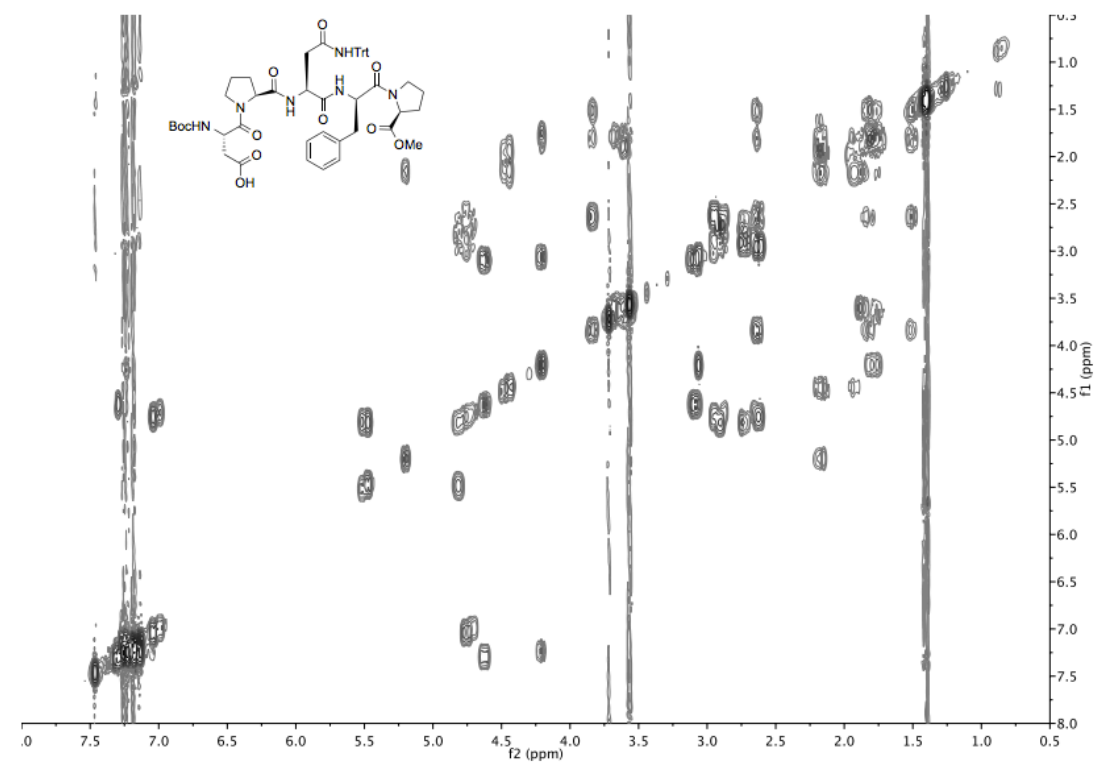

## Catalyst **22** 2D zTOCSY NMR

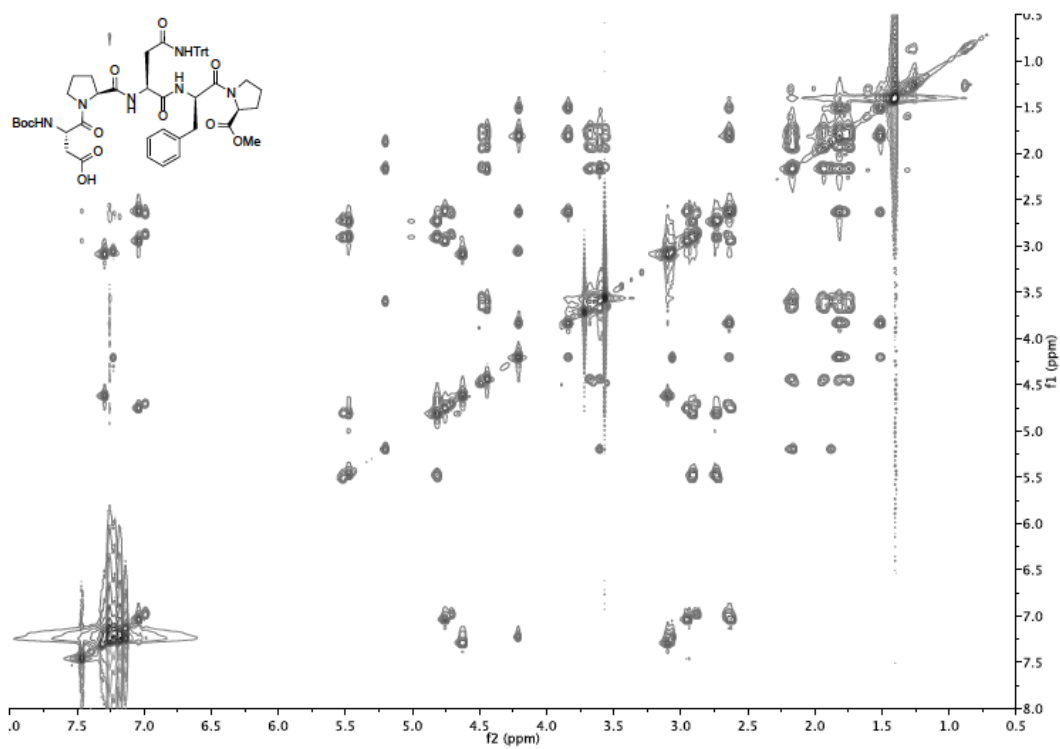

# Catalyst **22** 1D $^{13}\text{C}$ NMR

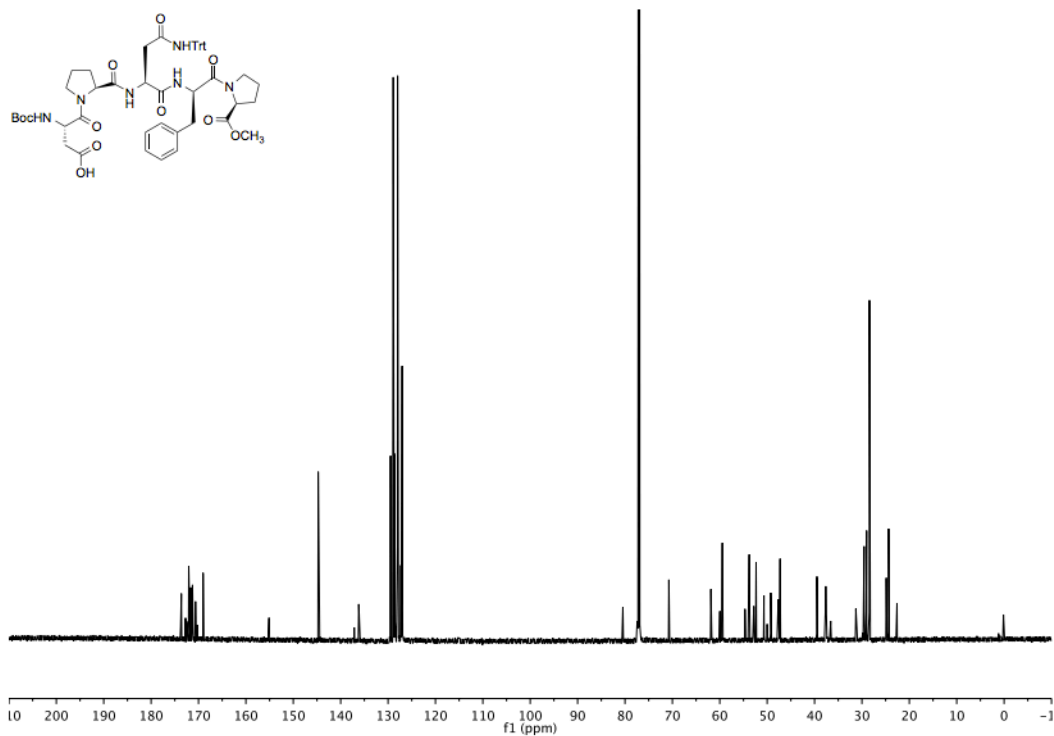

# Catalyst **23** 1D $^1\text{H}$ NMR

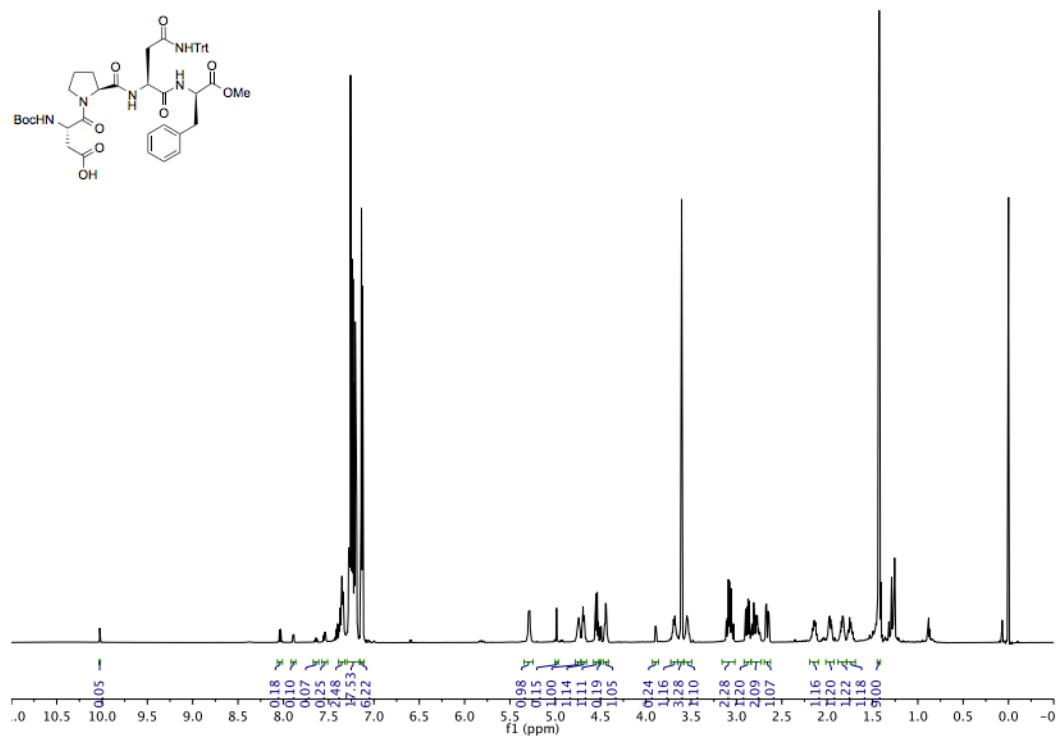

# Catalyst **23** 1D $^{13}\text{C}$ NMR

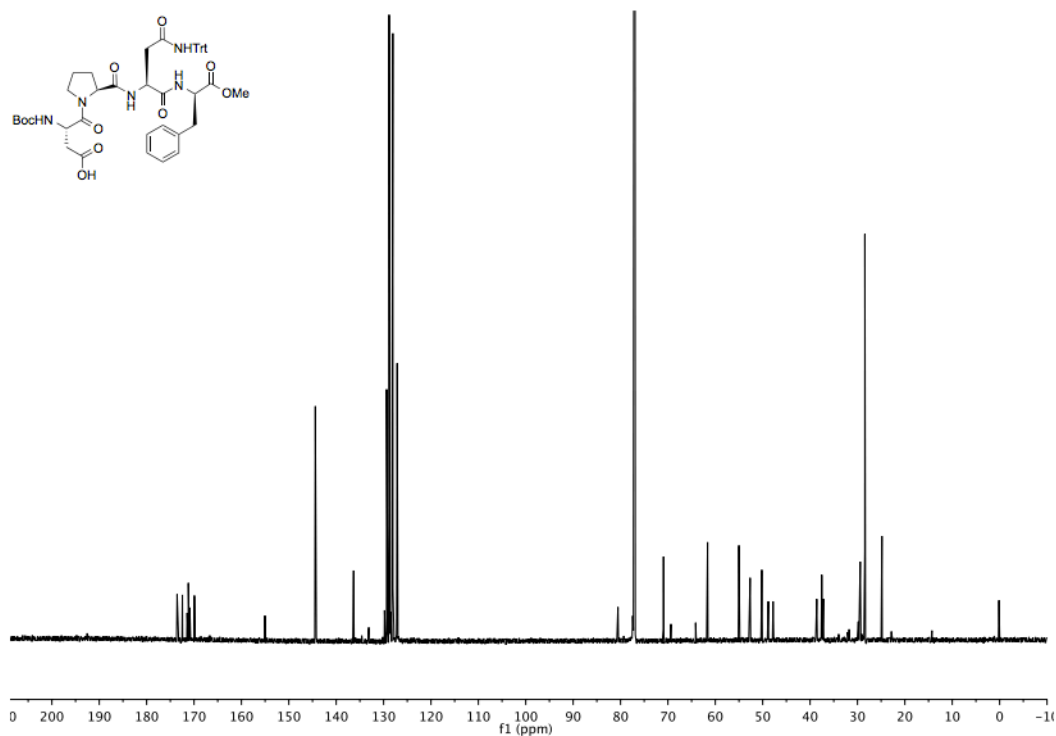

# Catalyst **24** 1D $^1\text{H}$ NMR

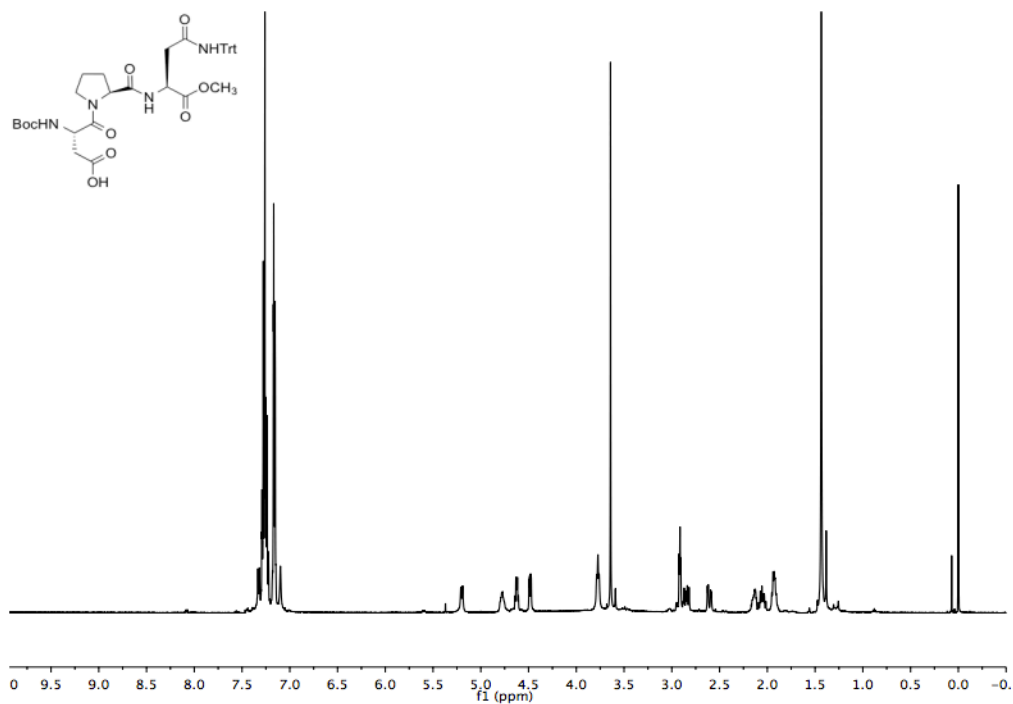

# Catalyst **24** 1D $^{13}\text{C}$ NMR

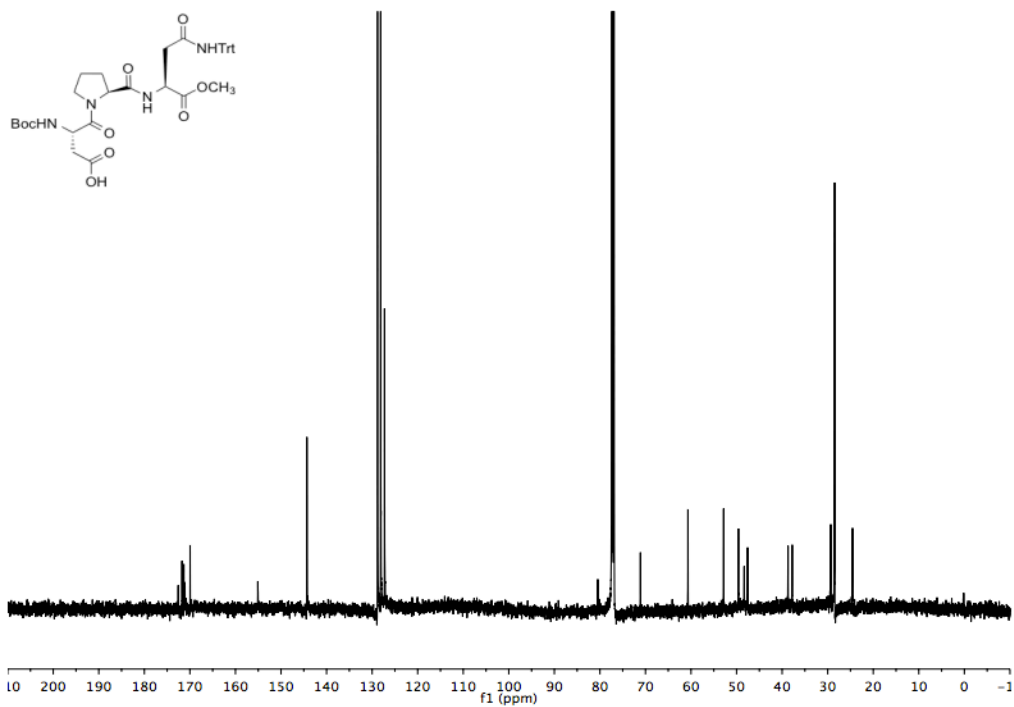

Supplement: c4sc01440e2.pdf [file c4sc01440e2.pdf]
